# Supplementary material for: Comparison of the treatment practice and hospitalization cost of percutaneous coronary intervention between a teaching hospital and a general hospital in Malaysia: A cross sectional study
Source: PLoS One. 2017 Sep 5;12(9):e0184410. doi: 10.1371/journal.pone.0184410 (PMC5584952; doi:10.1371/journal.pone.0184410)
Supplement: S1 File — (XLSX) [file pone.0184410.s001.xlsx]

## Sheet: Sheet1
PtSex	PtRace_Grouped	SDPID	LOS	LOS_3days	PtAge	AgeGroup	NeverSmoke_EverSmoke	cDys	cHPT	cDM	cPremCVD	cDCAD	cAnginaPast2Wk	cCerebrovascular	cPVascular	cRenalFail	BMIgroup	cHeartFail	cMI	PreviousPCI	PreviousCABG	NYHA	CCS	ACS	mThrombolytics	mBlockade	Brachial	Femoral	Radial	TotalLesionsTreatedThisPatient	InHospMortlity	PeriproceduralMI	EmergencyPCI	OtherComp	ExtentCD_LAD	ExtentCD_LCx	ExtentCD_RCA	ExtentCD_LMS	NumberofVessel	Single_MultipleVessels	LesionType_Complex	NumberOfStentsUsedThisLesion	NumberofDESused	NumberofBMSused	NumberofBVSused	NumberofDEBused	StentCost_ThisLesion	TIMIPost_Poor_1Good_2	BestResultofAllLesions
1	2	1005	14	1	45.59	0	1	0	0	0	0	0	0	0	0	0	1	0	1	0	0	0	0	1	2	2	0	0	1	1	0	0	0	0	0	1	1	0	2	1	0	2	0	2	0	0	5100	0	0
1	1	1005	13	1	55.02	0	1	1	1	1	0	0	1	0	0	0	0	0	1	0	0	1	1	1	2	2	0	0	1	1	0	0	0	0	1	0	0	0	1	0	0	1	1	0	0	0	5000	0	0
1	2	1005	16	1	61.55	1	1	0	1	0	0	1	0	0	0	0	0	0	0	0	0	0	0	0	2	2	0	0	1	1	0	0	0	0	1	0	0	0	1	0	0	1	1	0	0	0	5000	0	0
1	1	1005	2	0	66.15	1	1	1	1	1	1	99	1	99	99	99	1	99	99	0	0	0	0	0	2	2	0	1	0	2	0	0	0	0	1	1	1	0	3	1	1	0	0	0	0	0	0	0	0
1	4	1005	12	1	62.36	1	0	1	1	0	0	1	1	0	0	0	1	0	1	0	0	0	1	1	2	2	0	1	0	2	0	0	0	0	1	1	0	0	2	1	1	1	1	0	0	0	5000	0	0
2	1	1005	11	1	54.67	0	0	0	0	0	0	0	0	0	0	0	1	0	0	0	0	0	1	0	2	2	0	0	1	1	0	0	0	0	1	0	0	0	1	0	0	1	1	0	0	0	5300	0	0
1	2	1005	11	1	56.76	0	0	1	1	1	1	0	0	0	0	0	1	0	1	0	0	0	0	0	2	2	0	0	1	1	0	0	0	0	1	1	1	0	3	1	0	1	1	0	0	0	2500	0	0
1	2	1005	13	1	60.18	1	0	1	1	0	0	1	0	0	0	0	0	0	1	0	1	0	0	0	2	2	0	1	0	2	0	0	0	0	1	0	0	0	1	0	1	1	1	0	0	0	5000	0	0
1	2	1005	13	1	63.3	1	1	1	1	1	0	0	1	0	0	0	1	0	1	0	0	1	1	0	2	2	0	0	1	1	0	0	0	0	1	0	0	0	1	0	0	1	1	0	0	0	5000	0	0
1	2	1005	13	1	39.6	0	0	1	1	1	0	0	1	0	0	0	1	0	1	0	0	1	1	0	2	2	0	1	0	1	0	0	0	0	0	0	1	0	1	0	0	1	1	0	0	0	2500	0	0
1	2	1005	12	1	58.71	0	1	0	1	1	1	1	0	0	0	0	1	0	0	0	0	1	1	0	2	2	0	1	0	1	0	0	0	0	1	0	1	0	2	1	1	0	0	0	0	0	0	1	1
2	2	1005	12	1	50.65	0	0	1	1	0	1	1	0	0	0	0	1	0	0	1	0	0	1	0	2	2	0	1	0	1	0	0	0	0	1	0	0	0	1	0	1	1	1	0	0	0	5000	0	0
1	1	1005	13	1	63.42	1	1	1	1	0	0	0	0	0	0	0	1	0	1	0	0	0	1	0	2	2	0	0	1	1	0	0	0	0	1	0	1	0	2	1	1	1	1	0	0	0	5000	0	0
1	2	1005	12	1	60.76	1	1	1	1	1	1	1	0	0	0	0	0	0	99	0	0	0	0	1	2	2	0	1	0	2	0	0	0	0	1	0	1	0	2	1	1	2	0	0	0	2	9600	0	0
1	1	1005	11	1	57.93	0	0	1	1	0	1	1	0	0	0	0	1	0	1	0	0	0	0	0	2	2	0	1	0	2	1	0	0	0	1	1	1	1	4	1	0	3	3	0	0	0	15000	0	0
1	1	1005	5	1	58.49	0	1	1	1	1	0	1	1	0	0	0	1	1	1	0	0	1	1	1	2	2	0	0	1	2	0	0	0	0	1	0	0	0	1	0	99	1	1	0	0	0	5300	0	0
2	2	1005	10	1	63.77	1	1	1	0	0	0	1	0	0	0	0	0	0	1	0	0	0	0	0	2	2	0	1	0	1	0	0	0	0	1	0	1	0	2	1	0	1	0	1	0	0	2800	0	0
1	4	1005	9	1	59.9	0	1	1	1	0	0	0	0	0	0	0	1	1	1	0	0	1	1	0	2	2	0	0	1	1	0	0	0	0	0	1	0	0	1	0	0	1	1	0	0	0	2800	0	0
1	4	1005	5	1	74.01	1	0	0	1	1	0	0	0	0	0	0	0	0	0	1	0	1	1	0	2	2	0	1	0	2	0	0	0	0	1	0	0	0	1	0	0	0	0	0	0	0	0	0	0
1	1	1005	5	1	52.39	0	1	0	1	0	99	0	0	99	99	0	1	1	99	0	0	1	1	1	2	2	0	0	1	1	0	0	0	0	0	0	1	0	1	0	0	1	1	0	0	0	5000	0	0
2	4	1005	2	0	52.82	0	0	1	0	1	1	0	0	0	0	0	0	0	1	1	0	0	1	0	2	2	0	0	1	1	0	0	0	0	0	0	1	0	1	0	1	1	1	0	0	0	5000	0	0
1	1	1005	8	1	70.65	1	1	1	1	1	0	0	0	0	0	0	0	1	99	0	0	1	0	0	2	2	0	1	0	1	0	0	0	0	1	0	0	0	1	0	1	1	1	0	0	0	5000	0	0
1	4	1005	2	0	74.63	1	0	1	1	1	1	1	1	0	0	0	0	0	0	1	0	0	0	0	2	2	0	1	0	3	0	0	0	0	0	0	1	0	1	0	1	1	1	0	0	0	5000	0	0
1	4	1005	1	0	62.74	1	0	0	1	1	0	0	1	0	0	0	0	0	0	0	0	0	0	1	2	2	0	1	0	1	0	0	0	0	0	0	1	0	1	0	0	2	2	0	0	0	5200	0	0
1	2	1005	1	0	61.05	1	0	1	1	1	0	0	0	0	0	0	1	0	0	0	0	0	1	0	2	2	0	0	1	2	0	0	0	0	1	0	0	0	1	0	0	1	1	0	0	0	5000	0	0
1	2	1005	1	0	61.73	1	0	0	0	0	0	0	0	0	0	0	1	0	0	0	0	99	0	0	2	2	0	1	0	1	0	0	0	0	1	0	0	0	1	0	1	1	1	0	0	0	2800	0	0
1	2	1005	1	0	56.63	0	1	1	1	0	1	1	0	0	0	0	0	0	1	1	0	0	0	0	2	2	0	0	1	3	0	0	0	0	1	0	0	0	1	0	0	1	1	0	0	0	5000	0	0
1	4	1005	3	0	83.35	1	1	1	1	99	1	1	0	0	0	0	0	0	1	1	0	0	1	0	2	2	0	1	0	2	0	0	0	0	0	1	0	0	1	0	0	1	1	0	0	0	5000	0	0
1	1	1005	16	1	49.33	0	0	1	1	0	1	1	1	0	0	0	1	0	0	0	0	1	1	0	2	2	0	0	1	1	0	0	0	0	0	1	0	0	1	0	1	2	2	0	0	0	10000	0	0
1	4	1005	48	1	59.68	0	0	0	1	0	0	0	0	0	0	0	1	0	0	0	0	0	0	1	2	2	0	0	1	1	0	0	0	0	0	0	1	0	1	0	1	1	0	1	0	0	2800	0	0
1	2	1005	18	1	65.52	1	1	1	1	0	1	99	0	0	0	0	1	0	0	0	0	0	1	0	2	2	0	1	0	1	0	0	0	0	0	1	0	0	1	0	0	1	0	1	0	0	2800	0	0
1	4	1005	1	0	58.3	0	1	1	1	0	0	1	1	0	0	0	1	0	1	0	0	1	1	0	2	2	0	0	1	2	0	0	0	0	1	0	0	0	1	0	1	1	0	0	0	1	4800	0	0
2	1	1005	3	0	62.82	1	1	1	1	1	0	1	0	0	0	0	1	0	1	0	0	0	1	1	2	2	0	0	1	2	0	0	0	0	1	0	0	0	1	0	99	2	0	0	2	0	18000	0	0
2	2	1005	1	0	49.11	0	0	0	0	1	0	1	0	0	0	0	1	0	0	1	0	0	0	0	2	2	0	0	1	5	0	0	0	0	1	0	0	0	1	0	1	2	2	0	0	0	10000	0	0
1	1	1005	3	0	56.97	0	0	1	1	0	0	0	0	0	0	0	0	0	0	0	0	0	0	0	2	2	0	0	1	2	0	0	0	0	1	1	0	0	2	1	1	1	1	0	0	0	2500	0	0
1	1	1005	3	0	54.33	0	0	1	1	0	0	0	0	0	0	0	1	1	0	1	0	0	0	0	2	2	0	0	1	2	0	0	0	0	1	0	0	0	1	0	1	2	1	1	0	0	5400	0	0
1	1	1005	3	0	54.95	0	0	1	1	0	0	0	0	0	0	0	1	0	0	0	0	1	1	0	2	2	0	0	1	1	0	0	0	0	1	0	0	0	1	0	1	1	1	0	0	0	2300	0	0
1	1	1005	2	0	60.08	1	0	1	1	1	1	0	0	0	0	0	0	0	1	1	0	0	0	0	2	2	0	1	0	1	0	0	0	0	1	0	0	0	1	0	0	1	1	0	0	0	5000	0	0
2	4	1005	0	0	58.42	0	0	1	1	0	0	1	0	0	0	0	1	1	0	1	0	0	0	0	2	2	0	1	0	3	0	0	0	0	1	0	0	0	1	0	0	1	1	0	0	0	5000	0	0
1	4	1005	14	1	31.93	0	0	0	0	0	0	0	0	0	0	0	0	0	0	0	0	0	0	0	1	2	0	0	1	1	0	0	0	0	1	0	0	0	1	0	0	2	2	0	0	0	5200	0	0
1	1	1005	4	1	60.28	1	1	1	1	0	1	0	0	0	0	1	1	1	1	1	0	0	0	0	2	2	0	1	0	2	0	0	0	0	1	0	0	0	1	0	1	2	2	0	0	0	10000	0	0
1	1	1005	2	0	79.21	1	1	1	1	0	0	1	0	0	0	0	1	0	1	1	1	0	1	0	2	2	0	1	0	1	0	0	0	0	1	0	0	0	1	0	0	1	1	0	0	0	5000	0	0
1	2	1005	1	0	62.27	1	1	1	1	1	0	0	0	0	0	0	1	0	0	1	0	0	0	0	2	2	0	0	1	1	0	0	0	0	0	0	1	0	1	0	1	1	1	0	0	0	5000	0	0
1	2	1005	3	0	73.79	1	1	0	0	0	0	0	0	0	0	0	1	0	0	0	0	99	0	1	1	2	0	1	0	1	0	0	0	0	0	1	0	0	1	0	0	2	2	0	0	0	5200	0	0
1	2	1005	4	1	59.69	0	1	1	0	0	0	0	0	99	99	0	1	99	1	0	0	0	1	0	2	2	0	0	1	1	0	0	0	0	0	0	1	0	1	0	1	1	1	0	0	0	5000	0	0
2	1	1005	2	0	62.49	1	1	1	1	1	1	1	0	0	0	0	0	0	0	0	0	0	0	0	2	2	0	1	0	1	0	0	0	0	1	1	1	0	3	1	0	1	0	1	0	0	2800	0	0
1	2	1005	7	1	38.62	0	1	99	99	99	99	1	1	0	0	0	1	0	99	0	0	0	1	1	1	2	0	0	1	1	0	0	0	0	0	0	1	0	1	0	0	1	1	0	0	0	2600	0	0
1	2	1005	28	1	60.96	1	0	99	99	99	99	1	0	0	0	0	0	0	99	0	0	0	0	0	2	2	0	0	1	1	0	0	0	0	1	1	0	0	2	1	1	1	1	0	0	0	5000	0	0
1	1	1005	0	0	78.13	1	0	99	99	99	1	99	0	0	0	0	1	0	1	1	0	0	0	0	2	2	0	1	1	2	0	0	0	0	0	0	1	0	1	0	0	1	1	0	0	0	2300	0	0
2	4	1005	15	1	68.91	1	0	0	1	0	0	1	0	0	0	0	1	0	0	0	0	0	0	0	2	2	0	0	1	2	0	0	0	0	1	0	1	0	2	1	1	0	0	0	0	0	0	1	1
1	4	1005	0	0	41.83	0	1	0	0	0	0	0	1	0	0	1	1	0	0	0	0	0	0	0	2	2	0	1	0	1	0	0	0	0	0	0	1	0	1	0	0	1	1	0	0	0	5300	0	0
1	1	1005	0	0	54.17	0	1	0	0	1	0	0	0	0	0	0	0	0	1	0	0	0	0	0	2	2	0	0	1	1	0	0	0	0	1	0	0	0	1	0	0	0	0	0	0	0	0	1	1
1	2	1005	2	0	63.55	1	1	0	0	0	0	0	0	0	0	0	1	1	1	0	0	1	0	0	2	2	0	1	0	2	0	0	0	0	0	0	1	0	1	0	1	1	1	0	0	0	5000	0	0
1	4	1005	2	0	52.03	0	1	1	1	0	0	0	0	0	0	0	1	0	1	0	0	0	0	0	2	2	0	0	1	2	0	0	0	0	1	0	0	0	1	0	0	1	1	0	0	0	2500	0	0
1	2	1005	4	1	66.44	1	1	0	0	0	0	0	1	0	0	0	1	0	0	1	0	0	1	0	2	2	0	1	0	1	0	0	0	0	1	0	0	0	1	0	1	1	1	0	0	0	5000	0	0
1	2	1005	4	1	77.12	1	1	0	0	0	0	0	1	0	0	0	0	1	0	0	0	0	1	1	2	2	0	0	1	4	0	0	0	0	1	1	1	0	3	1	1	3	3	0	0	0	9600	0	0
1	1	1005	1	0	43.28	0	1	99	1	0	1	0	0	0	0	0	1	0	1	0	1	0	0	0	2	2	0	1	0	3	0	0	0	0	1	1	0	0	2	1	0	1	1	0	0	0	5000	0	0
1	3	1005	41	1	61.13	1	1	99	0	0	99	1	0	0	0	0	1	0	99	0	0	0	1	0	2	2	0	0	1	1	0	0	0	0	1	1	1	0	3	1	1	1	1	0	0	0	5000	0	0
1	4	1005	2	0	55.19	0	0	99	1	0	99	99	0	0	0	0	1	0	99	0	0	0	1	0	2	2	0	0	1	2	0	0	0	0	1	0	0	0	1	0	1	1	1	0	0	0	2500	0	0
2	4	1005	8	1	68.83	1	0	1	1	0	0	1	0	0	0	0	1	0	1	0	0	0	0	0	2	2	0	0	1	2	0	0	0	0	0	1	0	0	1	0	0	1	1	0	0	0	5000	0	0
2	4	1005	2	0	65.53	1	0	1	1	1	0	1	0	0	0	1	1	1	1	1	0	1	1	0	2	2	0	1	0	2	0	0	0	0	0	1	0	0	1	0	1	0	0	0	0	0	0	0	0
1	4	1005	9	1	53.94	0	0	0	1	1	0	1	0	0	0	0	0	0	1	0	0	1	1	1	2	2	0	0	1	2	0	0	0	0	1	0	1	0	2	1	1	1	1	0	0	0	5000	0	0
1	1	1005	29	1	55.7	0	1	1	1	1	0	1	1	99	99	99	1	1	0	0	0	0	0	1	2	2	0	0	1	1	0	0	0	0	1	0	0	0	1	0	99	1	1	0	0	0	5000	0	0
1	1	1005	4	1	49.56	0	0	1	0	0	0	0	0	0	0	0	1	0	0	1	0	1	1	0	2	2	0	0	1	1	0	0	0	0	1	0	0	0	1	0	1	1	1	0	0	0	5000	0	0
1	2	1005	1	0	63.73	1	1	1	1	0	0	1	0	0	0	0	1	0	0	0	0	0	0	0	2	2	0	0	1	1	0	0	0	0	0	1	0	0	1	0	0	1	1	0	0	0	5300	0	0
1	2	1005	2	0	47.52	0	1	1	1	0	0	0	0	0	0	0	1	0	1	0	0	0	0	0	2	2	0	0	1	1	0	0	0	0	1	0	0	0	1	0	1	1	1	0	0	0	5000	0	0
1	4	1005	3	0	49.22	0	1	0	0	0	0	0	0	0	0	0	1	0	0	0	0	0	0	0	2	2	0	1	0	2	0	0	0	0	1	0	0	0	1	0	1	1	1	0	0	0	5000	0	0
2	4	1005	0	0	57.04	0	0	1	1	1	0	0	1	1	0	0	1	0	0	0	0	0	1	1	2	1	0	1	0	1	0	0	0	0	0	0	1	0	1	0	1	1	1	0	0	0	5000	0	0
1	2	1005	0	0	43.44	0	1	1	0	0	1	0	0	0	0	0	1	0	1	0	0	0	1	0	2	2	0	1	0	1	0	0	0	0	1	0	0	0	1	0	1	1	1	0	0	0	5000	0	0
1	1	1005	5	1	46.92	0	1	0	0	0	0	0	0	0	0	0	0	0	0	1	0	0	1	0	2	2	0	1	0	1	0	0	0	0	1	0	0	0	1	0	0	1	1	0	0	0	5300	0	0
2	2	1005	2	0	45.49	0	0	1	1	1	1	0	0	0	0	0	0	0	99	0	0	0	0	0	2	2	0	1	0	1	0	0	0	0	1	0	1	0	2	1	1	3	3	0	0	0	15000	0	0
1	2	1005	1	0	54.57	0	0	0	0	0	1	0	1	0	0	0	0	0	1	0	0	0	1	1	1	2	0	1	0	2	0	0	0	0	0	1	0	0	1	0	1	1	1	0	0	0	2800	0	0
1	1	1005	1	0	45.91	0	0	0	0	0	0	0	0	0	0	0	0	0	0	0	0	0	1	0	2	2	0	0	1	1	0	0	0	0	0	1	0	0	1	0	0	1	0	1	0	0	2500	0	0
1	2	1005	3	0	56.18	0	0	0	0	0	0	0	0	0	0	0	1	0	1	1	0	0	0	0	2	2	0	0	1	1	0	0	0	0	0	0	1	0	1	0	0	1	1	0	0	0	2600	0	0
1	1	1005	5	1	78.18	1	1	0	0	0	0	99	0	0	0	0	1	0	0	1	0	1	1	0	2	2	0	1	0	1	0	0	0	0	1	0	0	0	1	0	0	1	1	0	0	0	5000	0	0
1	4	1005	2	0	65.41	1	1	1	1	0	0	0	0	0	0	0	0	0	0	1	0	0	1	0	2	2	0	1	0	2	0	0	0	0	0	0	1	0	1	0	0	1	1	0	0	0	5300	0	0
2	4	1005	2	0	48.05	0	1	1	1	0	0	0	0	0	0	0	1	0	1	0	0	0	0	0	2	2	0	0	1	1	0	0	0	0	1	0	0	0	1	0	1	1	1	0	0	0	5300	0	0
1	4	1005	1	0	66.11	1	1	99	99	0	0	1	0	0	0	0	1	0	0	0	0	0	0	0	2	2	0	0	1	1	0	0	0	0	1	1	1	0	3	1	0	1	1	0	0	0	5300	0	0
1	2	1005	1	0	46.78	0	1	1	1	1	1	1	1	0	0	0	0	1	0	1	0	0	0	0	2	2	0	1	0	2	0	0	0	0	0	0	1	0	1	0	1	1	1	0	0	0	5000	0	0
1	1	1005	2	0	45.57	0	1	1	1	1	0	0	0	0	0	0	0	0	1	1	0	0	1	1	1	2	0	0	1	1	0	0	0	0	0	0	1	0	1	0	1	0	0	0	0	0	0	0	0
1	2	1005	2	0	49.45	0	1	1	1	0	0	1	0	0	0	0	1	0	0	1	0	0	0	0	2	2	0	0	1	2	0	0	0	0	1	0	0	0	1	0	1	2	2	0	0	0	10000	0	0
1	1	1005	2	0	50.97	0	1	1	1	1	0	1	0	0	0	1	1	0	0	0	0	0	0	0	2	2	0	1	0	2	0	0	0	0	0	0	1	0	1	0	1	3	3	0	0	0	12600	0	0
1	4	1005	6	1	58.76	0	0	1	1	0	0	0	0	0	0	0	1	0	0	0	0	0	1	0	2	2	0	0	1	1	0	0	0	0	1	0	0	0	1	0	1	0	0	0	0	0	0	1	1
1	2	1005	2	0	60.36	1	1	0	0	0	0	0	0	0	0	0	1	0	0	1	0	0	0	0	2	2	0	0	1	2	0	0	0	0	0	0	1	0	1	0	0	1	1	0	0	0	2600	0	0
1	1	1005	1	0	82.74	1	1	0	0	0	0	0	1	0	0	1	0	0	1	1	0	0	0	0	2	2	0	1	0	2	0	0	0	0	1	0	1	0	2	1	1	3	3	0	0	0	15300	0	0
1	4	1005	0	0	68.42	1	0	1	1	0	1	0	0	0	0	0	1	0	1	1	0	0	0	0	2	2	0	0	1	2	0	0	0	0	1	1	1	0	3	1	1	1	1	0	0	0	5000	0	0
1	1	1005	0	0	53.76	0	1	1	1	0	1	1	0	0	0	0	0	0	1	0	0	0	0	0	2	2	0	0	1	1	0	0	0	0	0	1	0	0	1	0	1	1	1	0	0	0	5000	0	0
1	1	1005	2	0	62.4	1	1	1	1	1	1	0	0	0	0	0	1	0	1	1	0	0	0	0	2	2	0	0	1	1	0	0	0	0	1	0	0	1	2	1	0	0	0	0	0	0	0	0	0
2	2	1005	3	0	53.77	0	1	1	1	0	0	1	0	0	0	0	0	0	1	0	0	0	1	0	2	2	0	0	1	3	0	0	0	0	1	0	0	0	1	0	1	2	2	0	0	0	10000	0	0
1	2	1005	20	1	83.15	1	0	1	1	0	0	0	1	0	0	0	0	0	99	0	0	0	0	0	2	2	0	0	1	1	1	0	0	0	1	0	0	0	1	0	1	1	0	1	0	0	2500	0	0
1	4	1005	0	0	54.45	0	1	1	1	0	0	0	0	0	0	0	0	0	0	1	0	0	0	0	2	2	0	1	0	2	0	0	0	0	1	0	1	0	2	1	1	4	0	4	0	0	10000	0	0
1	4	1005	1	0	40.34	0	1	1	1	1	1	0	0	0	0	0	1	0	99	0	0	0	0	0	2	2	0	0	1	1	0	0	0	0	1	0	0	0	1	0	0	1	1	0	0	0	5000	0	0
1	1	1005	2	0	55.73	0	1	1	1	0	99	0	0	0	0	0	0	0	99	0	0	1	1	0	2	2	0	0	1	2	0	0	0	0	0	1	0	0	1	0	1	1	1	0	0	0	5000	0	0
1	1	1005	2	0	48.53	0	1	1	1	0	99	0	0	0	0	0	1	1	99	0	0	1	1	0	2	2	0	1	1	1	0	0	0	0	1	0	0	0	1	0	0	1	1	0	0	0	5000	0	0
1	1	1005	44	1	61.35	1	0	1	1	1	0	1	1	0	0	0	1	0	1	1	0	0	0	0	2	2	0	1	0	1	0	0	0	0	1	0	0	0	1	0	0	1	1	0	0	0	5000	0	0
1	1	1005	5	1	40.13	0	1	1	1	0	1	1	0	0	0	0	0	0	1	1	0	0	0	1	2	2	0	0	1	2	0	0	0	0	1	0	0	0	1	0	1	1	1	0	0	0	5000	0	0
1	1	1005	2	0	63.4	1	1	0	0	1	0	1	0	0	0	0	1	0	0	0	0	0	0	0	2	2	0	0	1	1	0	0	0	0	1	0	1	0	2	1	1	1	0	1	0	0	2600	0	0
1	1	1005	6	1	52.88	0	1	1	1	1	0	1	0	0	0	0	0	1	1	0	0	1	1	0	2	2	0	1	0	1	0	0	0	0	1	0	0	0	1	0	1	1	1	0	0	0	2600	0	0
1	2	1005	5	1	54.04	0	0	1	1	1	1	1	1	0	0	0	1	0	1	1	0	0	0	0	2	2	0	0	1	1	0	0	0	0	0	0	1	0	1	0	0	1	1	0	0	0	2800	0	0
1	4	1005	4	1	68.06	1	1	1	0	0	0	1	0	0	0	0	1	0	1	1	0	1	1	0	2	2	0	0	1	3	0	0	0	0	1	0	0	0	1	0	1	1	1	0	0	0	5000	0	0
1	2	1005	3	0	47.22	0	0	1	1	0	99	99	99	99	99	99	1	99	99	0	0	0	99	0	2	2	0	0	1	1	0	0	0	0	1	0	0	0	1	0	1	2	2	0	0	0	10000	0	0
1	3	1005	4	1	51.7	0	1	1	1	0	0	0	0	0	0	0	1	0	1	0	0	0	0	1	2	2	0	0	1	2	0	0	0	0	0	1	0	0	1	0	1	1	1	0	0	0	5000	0	0
1	4	1005	1	0	58.37	0	0	1	1	0	0	0	0	0	0	0	0	0	0	0	0	0	0	0	2	2	0	0	1	2	0	0	0	0	1	1	0	0	2	1	0	1	1	0	0	0	5000	0	0
1	1	1005	2	0	53.06	0	1	0	0	0	1	1	1	0	0	0	0	0	1	0	0	1	0	1	2	2	0	0	1	1	0	0	0	0	1	0	0	0	1	0	1	1	1	0	0	0	5000	0	0
1	1	1005	4	1	53.06	0	1	1	1	0	0	0	0	0	0	0	1	0	1	0	0	0	0	1	2	2	0	1	0	1	0	0	0	0	1	0	0	0	1	0	0	2	0	0	2	0	16000	0	0
1	1	1005	3	0	54.9	0	0	1	1	1	1	99	1	99	99	99	1	99	99	0	0	0	1	0	2	1	0	0	1	1	0	0	0	0	1	1	0	0	2	1	1	1	1	0	0	0	5000	0	0
2	1	1005	2	0	47.52	0	1	0	0	0	0	1	0	0	0	0	1	0	0	1	0	0	0	0	2	2	0	0	1	1	0	0	0	0	1	0	0	0	1	0	0	1	1	0	0	0	5000	0	0
1	2	1005	1	0	59.35	0	0	0	0	1	0	0	0	0	0	0	1	0	1	0	0	0	0	0	2	2	0	0	1	2	0	0	0	0	1	0	0	0	1	0	1	1	1	0	0	0	5300	0	0
1	4	1005	0	0	48.34	0	1	0	0	0	0	1	0	0	0	0	1	0	1	0	0	0	0	0	2	2	0	0	1	2	0	0	0	0	0	1	0	0	1	0	1	1	1	0	0	0	5000	0	0
1	2	1005	1	0	74.77	1	1	1	1	1	0	0	0	0	0	0	0	1	0	0	0	0	0	0	2	2	0	1	0	2	0	0	0	0	1	0	1	0	2	1	1	3	2	1	0	0	12600	0	0
1	1	1005	2	0	63.97	1	0	1	1	1	1	1	0	0	0	0	1	0	1	1	0	0	1	0	2	2	0	0	1	1	0	0	0	0	1	0	0	0	1	0	1	1	1	0	0	0	5000	0	0
1	2	1005	1	0	40.21	0	0	0	1	0	0	1	0	0	0	0	1	0	1	1	0	0	0	0	2	2	0	1	0	1	0	0	0	0	1	0	1	0	2	1	1	2	2	0	0	0	4900	0	0
1	1	1005	3	0	71.48	1	0	1	1	0	1	0	0	0	0	0	0	0	0	0	0	0	1	0	2	2	0	0	1	2	0	0	0	0	1	0	1	0	2	1	1	2	1	1	0	0	7600	0	0
1	2	1005	2	0	59.99	0	0	1	1	0	0	1	0	0	0	0	0	1	1	1	0	0	0	0	2	2	0	1	0	1	0	0	0	0	1	0	0	0	1	0	0	1	1	0	0	0	5000	0	0
1	2	1005	3	0	39.59	0	1	0	0	1	0	1	1	0	0	0	1	0	1	0	0	0	0	0	2	2	0	0	1	1	0	0	0	0	1	1	1	0	3	1	0	1	1	0	0	0	5300	0	0
1	1	1005	2	0	45.47	0	1	1	1	1	1	0	0	0	0	0	1	0	0	0	0	0	1	0	2	2	0	0	1	1	0	0	0	0	1	0	0	0	1	0	0	0	0	0	0	0	0	0	0
1	1	1005	3	0	60.43	1	0	0	1	0	0	0	0	0	0	0	1	0	0	0	0	1	1	1	2	2	0	1	0	2	0	0	0	0	0	1	1	0	2	1	1	0	0	0	0	0	0	1	1
1	2	1005	0	0	67.88	1	1	0	1	1	0	0	0	0	0	0	0	0	0	0	0	0	0	0	2	2	0	0	1	1	0	0	0	0	0	0	1	0	1	0	1	1	1	0	0	0	5000	0	0
1	1	1005	1	0	75.57	1	1	1	1	1	0	1	0	0	0	0	1	0	0	1	0	0	1	0	2	2	0	1	0	2	0	0	0	0	1	0	0	0	1	0	1	2	2	0	0	0	10000	0	0
2	2	1005	0	0	64.33	1	0	1	1	0	0	1	0	0	0	0	1	0	0	0	0	0	1	0	2	2	0	0	1	1	0	0	0	0	0	0	1	0	1	0	0	1	1	0	0	0	2800	0	0
1	4	1005	0	0	68.08	1	0	0	1	1	0	0	0	0	0	0	0	0	0	0	0	0	0	0	2	2	0	0	1	2	0	0	0	0	1	0	0	0	1	0	0	1	1	0	0	0	5300	0	0
1	4	1005	2	0	54.28	0	0	0	1	0	0	0	0	0	0	0	1	0	1	0	0	0	1	0	2	2	0	0	1	1	0	0	0	0	1	1	1	0	3	1	1	1	1	0	0	0	5000	0	0
1	4	1005	0	0	52.52	0	1	0	0	0	0	0	0	0	0	0	1	0	1	0	0	0	0	0	2	2	0	0	1	2	0	0	0	0	0	0	1	0	1	0	0	1	1	0	0	0	5000	0	0
1	1	1005	2	0	39.84	0	1	1	1	1	1	0	0	0	0	0	1	0	1	0	0	0	1	0	2	2	0	1	0	1	0	0	0	0	1	0	0	0	1	0	1	1	1	0	0	0	5000	0	0
1	2	1005	0	0	68.27	1	0	1	1	1	0	1	0	0	0	0	0	0	0	0	0	1	0	0	2	2	0	1	0	1	0	0	0	0	1	1	0	0	2	1	1	3	3	0	0	0	15000	0	0
1	1	1005	2	0	44.59	0	1	0	0	0	0	0	0	0	0	0	1	0	1	0	0	1	1	0	2	2	0	0	1	1	0	0	0	0	0	0	1	0	1	0	0	1	1	0	0	0	2500	0	0
1	4	1005	2	0	55.84	0	1	1	1	1	0	0	0	0	0	0	1	0	0	0	0	0	1	0	2	2	0	0	1	2	0	0	0	0	1	1	1	0	3	1	0	1	1	0	0	0	2500	0	0
1	4	1005	2	0	61.45	1	1	0	0	0	0	0	0	0	0	0	1	1	1	0	0	1	0	0	2	2	0	0	1	2	0	0	0	0	1	0	0	0	1	0	1	1	1	0	0	0	2500	0	0
1	4	1005	2	0	72.82	1	1	1	1	0	0	0	0	0	0	0	0	0	1	0	0	1	1	0	2	2	1	0	0	1	0	0	0	0	1	1	1	0	3	1	1	2	2	0	0	0	10000	0	0
1	4	1005	0	0	41.67	0	1	1	0	0	0	0	0	0	0	0	0	0	0	0	0	0	0	0	1	2	0	1	0	2	0	0	0	0	1	0	0	0	1	0	0	1	1	0	0	0	5300	0	0
2	2	1005	0	0	68.66	1	0	1	1	1	1	0	0	0	0	0	1	0	99	0	0	0	0	0	2	2	0	0	1	1	0	0	0	0	1	1	0	0	2	1	0	1	1	0	0	0	5000	0	0
1	2	1005	0	0	54.53	0	0	1	1	1	1	0	0	0	0	0	1	0	99	0	0	0	0	0	2	2	0	0	1	1	0	0	0	0	1	0	0	0	1	0	0	1	1	0	0	0	2300	0	0
1	4	1005	1	0	59.72	0	0	1	1	0	99	1	0	0	0	0	0	0	99	0	0	0	0	0	2	2	0	0	1	1	0	0	0	0	1	0	0	0	1	0	0	1	1	0	0	0	2500	0	0
2	2	1005	2	0	70.2	1	0	1	1	1	0	0	0	0	0	0	0	0	0	0	0	0	0	0	2	2	0	0	1	1	0	0	0	0	1	0	0	0	1	0	0	1	1	0	0	0	2800	0	0
2	4	1005	2	0	50.54	0	1	1	1	0	0	1	0	0	0	0	1	0	1	0	0	0	1	0	2	2	0	0	1	2	0	0	0	0	1	0	1	0	2	1	1	1	1	0	0	0	2500	0	0
1	4	1005	2	0	36.25	0	0	1	0	1	1	0	0	0	0	0	0	0	1	0	0	0	1	1	2	2	0	0	1	1	0	0	0	0	1	0	0	0	1	0	1	1	1	0	0	0	5000	0	0
1	4	1005	4	1	64.95	1	0	1	1	99	1	0	1	99	0	0	1	0	1	0	0	0	1	0	2	2	0	0	1	1	0	0	0	0	0	0	1	0	1	0	1	1	1	0	0	0	5000	0	0
1	2	1005	2	0	51.46	0	1	1	1	0	1	1	0	0	0	0	1	0	0	0	0	1	1	0	2	2	0	0	1	1	0	0	0	0	0	0	1	0	1	0	1	2	2	0	0	0	10000	0	0
1	1	1005	0	0	53.51	0	1	1	0	0	0	0	1	0	0	0	0	0	0	0	0	0	0	0	2	2	0	0	1	4	0	0	0	0	1	0	0	0	1	0	0	1	1	0	0	0	5000	0	0
1	2	1005	0	0	63.8	1	1	1	1	0	99	1	0	0	0	0	1	0	99	0	0	0	0	0	2	2	0	0	1	1	0	0	0	0	1	1	0	0	2	1	99	2	2	0	0	0	10000	0	0
1	4	1005	0	0	60.68	1	1	1	1	0	1	1	1	99	99	99	1	99	1	1	0	0	0	0	2	2	0	0	1	4	0	0	0	0	1	1	0	0	2	1	0	1	1	0	0	0	2600	0	0
2	4	1005	0	0	50.5	0	0	1	1	0	1	0	0	0	0	0	1	0	0	0	0	0	0	0	2	2	0	0	1	1	0	0	0	0	1	1	0	0	2	1	0	1	1	0	0	0	5000	0	0
1	2	1005	0	0	57.2	0	1	99	99	99	99	99	99	99	99	99	0	99	99	0	0	0	0	0	2	2	0	0	1	1	0	0	0	0	1	0	0	0	1	0	0	1	0	1	0	0	2600	0	0
1	2	1005	2	0	82.12	1	0	1	1	0	0	0	0	0	0	0	0	0	0	0	0	0	0	0	2	2	0	1	0	1	0	0	0	0	1	0	0	0	1	0	0	1	0	1	0	0	2800	0	0
1	4	1005	0	0	42.43	0	1	1	99	99	0	99	0	0	0	0	1	0	0	0	0	0	0	0	2	2	0	0	1	2	0	0	0	0	1	0	0	0	1	0	0	1	1	0	0	0	5000	0	0
1	4	1005	1	0	47.42	0	0	1	1	1	0	0	0	0	0	0	1	0	0	0	0	0	0	0	2	2	0	1	0	3	0	0	0	0	1	1	0	0	2	1	1	2	2	0	0	0	10000	0	0
1	4	1005	0	0	56.77	0	0	0	0	0	0	0	0	0	0	0	1	0	1	0	0	0	1	1	2	2	0	0	1	2	0	0	0	0	0	0	1	0	1	0	0	1	1	0	0	0	5000	0	0
1	2	1005	0	0	71.83	1	0	0	1	0	0	0	0	0	0	0	0	0	0	0	0	0	0	0	2	2	0	0	1	4	0	0	0	0	0	1	0	0	1	0	1	1	1	0	0	0	4800	0	0
1	4	1005	1	0	39.93	0	1	0	0	0	0	0	0	0	0	0	0	0	1	0	0	0	0	0	1	2	0	0	1	2	0	0	0	0	1	0	1	0	2	1	1	2	2	0	0	0	5000	0	0
1	1	1005	2	0	56.48	0	1	1	1	0	0	1	1	0	0	0	1	0	0	0	0	0	0	0	2	2	0	0	1	1	0	0	0	0	1	1	1	0	3	1	1	0	0	0	0	0	0	1	1
1	4	1005	3	0	71.59	1	1	1	1	0	99	0	0	0	0	0	0	0	99	0	0	0	0	0	2	2	0	0	1	1	0	0	0	0	1	1	0	0	2	1	1	2	2	0	0	0	10000	0	0
1	1	1005	2	0	48.31	0	1	1	1	1	0	0	0	0	0	0	1	0	1	0	0	0	0	0	2	2	0	0	1	1	0	0	0	0	1	0	0	0	1	0	99	1	1	0	0	0	5000	0	0
1	4	1005	1	0	34.17	0	1	1	1	0	0	0	0	0	0	0	0	0	1	0	0	0	0	0	2	2	0	0	1	2	0	0	0	0	1	0	0	0	1	0	1	1	1	0	0	0	5000	0	0
1	1	1005	4	1	70.87	1	1	1	1	0	0	0	0	0	0	0	1	0	0	0	0	0	0	0	2	2	0	0	1	1	0	0	0	0	1	0	0	0	1	0	1	1	1	0	0	0	2300	0	0
1	1	1005	5	1	79.77	1	1	1	1	0	0	0	0	0	0	0	0	0	1	0	0	0	0	0	2	2	0	0	1	2	0	0	0	0	1	0	0	0	1	0	0	1	1	0	0	0	2600	0	0
1	2	1005	5	1	54.92	0	0	1	1	1	0	0	0	0	0	0	1	0	0	0	0	0	0	0	2	1	0	0	1	1	0	0	0	0	1	0	0	0	1	0	1	1	1	0	0	0	4800	0	0
1	2	1005	5	1	66	1	1	0	1	0	0	0	0	0	0	0	1	0	0	0	0	0	0	0	2	2	0	0	1	1	0	0	0	0	0	0	1	0	1	0	1	2	1	0	1	0	18000	0	0
1	2	1005	5	1	83.03	1	0	1	1	0	0	0	0	0	0	0	1	0	0	0	0	0	0	0	2	2	0	0	1	1	0	0	0	0	1	0	0	0	1	0	1	1	1	0	0	0	2600	0	0
2	1	1005	1	0	62.92	1	0	0	0	1	0	0	0	0	0	0	1	0	0	0	0	0	0	0	2	2	0	1	0	2	0	0	0	0	1	0	0	0	1	0	1	1	1	0	0	0	4800	0	0
2	2	1005	2	0	49.21	0	0	1	1	0	0	0	0	0	0	0	1	0	0	0	0	0	1	1	2	2	0	0	1	1	0	0	0	0	1	0	0	0	1	0	1	1	1	0	0	0	5000	0	0
1	4	1005	2	0	66.51	1	1	0	0	0	0	0	0	0	0	0	1	0	0	0	0	0	1	1	2	2	0	0	1	2	0	0	0	0	1	0	0	0	1	0	0	1	1	0	0	0	8000	0	0
1	1	1005	0	0	47.3	0	1	1	0	0	1	0	0	0	0	0	1	0	1	0	0	0	0	0	2	2	0	0	1	1	0	0	0	0	1	0	0	0	1	0	1	1	1	0	0	0	2300	1	0
1	2	1005	0	0	61.08	1	1	1	1	1	1	1	0	0	0	0	1	0	0	0	0	0	1	0	2	2	0	0	1	2	0	0	0	0	1	1	1	0	3	1	0	1	1	0	0	0	5300	0	0
1	2	1005	1	0	54.38	0	1	1	1	0	0	0	0	0	0	0	0	0	0	0	0	0	1	0	2	2	0	0	1	2	0	0	0	0	0	0	1	0	1	0	1	2	0	2	0	0	4900	0	0
1	4	1005	0	0	47.04	0	1	0	0	0	0	0	0	0	0	0	0	0	0	0	0	0	0	0	2	2	1	0	0	1	0	0	0	0	1	0	1	0	2	1	1	0	0	0	0	0	0	1	1
1	2	1005	0	0	74.14	1	0	0	0	0	0	1	0	0	0	0	0	0	0	0	0	1	1	0	2	2	0	0	1	1	0	0	0	0	1	0	1	0	2	1	0	1	1	0	0	0	2600	0	0
1	2	1005	1	0	57.38	0	0	0	1	1	1	1	0	0	0	0	0	0	1	0	0	1	0	0	2	2	0	0	1	1	0	0	0	0	1	0	0	0	1	0	1	1	1	0	0	0	5300	0	0
1	1	1005	1	0	55.8	0	0	1	0	0	0	1	0	0	0	0	1	0	0	0	0	0	0	0	2	2	0	0	1	3	0	0	0	0	0	1	0	0	1	0	1	1	1	0	0	0	5000	0	0
2	4	1005	1	0	67.7	1	0	0	1	0	0	0	0	0	0	0	1	0	0	0	0	0	0	0	2	2	0	1	0	2	0	0	0	0	0	0	1	0	1	0	1	1	1	0	0	0	4800	0	0
1	1	1005	0	0	74.45	1	1	0	0	0	0	0	0	0	0	0	1	0	0	0	0	0	0	0	2	2	0	0	1	1	0	0	0	0	1	0	0	0	1	0	0	1	0	0	0	1	4800	0	0
1	4	1005	1	0	67.2	1	1	1	1	0	0	0	0	0	0	0	0	0	0	0	0	0	0	0	2	2	0	1	1	2	0	0	0	0	0	1	0	0	1	0	1	1	1	0	0	0	5000	0	0
1	2	1005	5	1	57.32	0	0	1	1	1	0	1	0	0	0	0	1	0	0	0	0	0	0	0	2	1	0	1	0	3	0	0	0	0	1	0	0	0	1	0	1	1	1	0	0	0	4800	0	0
1	2	1005	4	1	62.18	1	1	1	1	0	0	0	0	0	0	0	0	0	0	0	0	0	0	0	2	2	0	1	0	2	0	0	0	0	0	0	1	0	1	0	0	1	1	0	0	0	5000	0	0
1	2	1005	2	0	55.46	0	0	1	1	0	1	99	1	99	99	99	1	99	1	1	0	0	0	0	2	2	0	0	1	1	0	0	0	0	1	0	0	0	1	0	0	1	1	0	0	0	5300	0	0
1	1	1005	1	0	73.36	1	1	1	1	99	1	0	0	1	0	0	0	0	1	0	0	0	0	0	1	2	0	1	1	1	0	0	0	0	0	0	1	0	1	0	0	0	0	0	0	0	0	0	0
1	1	1005	1	0	47.87	0	1	1	99	99	1	99	1	99	99	99	0	99	1	0	0	0	0	0	2	2	0	0	1	2	0	0	0	0	1	0	0	0	1	0	99	1	0	1	0	0	2600	0	0
1	2	1005	4	1	60.42	1	0	1	1	0	0	0	0	0	0	0	0	0	0	0	0	0	0	0	2	2	0	1	0	3	0	0	0	0	1	1	0	0	2	1	1	2	1	1	0	0	7600	0	0
1	2	1005	6	1	69.72	1	1	99	99	99	99	99	99	99	99	99	1	99	99	0	0	0	0	0	2	2	0	1	0	1	0	0	0	0	1	1	1	0	3	1	0	3	2	1	0	0	12600	0	0
2	2	1005	2	0	63.72	1	0	1	0	0	0	0	0	0	0	0	0	0	0	0	0	0	0	0	2	2	0	0	1	2	0	0	0	0	1	0	0	0	1	0	1	2	2	0	0	0	5200	0	0
1	2	1005	0	0	57.57	0	1	1	1	0	0	0	0	0	0	0	1	0	0	0	0	0	0	0	2	2	0	0	1	1	0	0	0	0	0	0	1	0	1	0	1	1	1	0	0	0	2600	0	0
1	2	1005	0	0	52.62	0	0	1	0	0	1	1	0	0	0	0	1	0	0	1	0	0	1	0	2	2	0	0	1	1	0	0	0	0	0	0	1	0	1	0	1	3	3	0	0	0	15000	0	0
1	2	1005	5	1	72.24	1	0	1	1	1	0	1	0	0	0	1	0	0	0	1	0	0	0	0	2	2	0	1	0	2	0	0	0	0	1	1	0	0	2	1	1	1	1	0	0	0	2600	0	0
1	4	1005	0	0	56.09	0	0	1	1	0	0	0	0	0	0	0	1	0	0	0	0	0	1	0	2	2	0	0	1	1	0	0	0	0	1	0	1	0	2	1	0	1	1	0	0	0	5300	0	0
1	4	1005	2	0	53.96	0	1	0	0	0	0	0	0	0	0	0	1	0	1	0	0	0	0	0	2	2	0	1	0	2	0	0	0	0	1	0	0	0	1	0	1	1	1	0	0	0	5000	0	0
1	4	1005	2	0	62.37	1	1	1	1	1	0	0	0	0	0	0	0	0	1	0	0	0	0	0	2	2	0	0	1	1	0	0	0	0	1	1	0	0	2	1	0	1	1	0	0	0	2600	0	0
1	1	1005	0	0	51.23	0	0	1	1	0	0	1	0	0	0	0	1	0	0	0	0	0	0	0	2	2	0	0	1	2	0	0	0	0	0	0	1	0	1	0	1	0	0	0	0	0	0	0	0
1	4	1005	0	0	50.32	0	1	1	1	1	0	0	0	0	0	0	0	0	0	0	0	0	0	0	2	2	0	0	1	1	0	0	0	0	0	0	1	0	1	0	1	1	1	0	0	0	5000	0	0
2	4	1005	1	0	60.71	1	0	1	1	1	1	0	0	0	0	0	1	0	0	0	0	0	0	0	2	2	0	0	1	1	0	0	0	0	0	1	1	1	3	1	99	2	2	0	0	0	7300	0	0
1	1	1005	1	0	68.34	1	1	1	1	0	0	0	0	0	0	0	0	0	1	0	0	0	0	0	2	2	0	0	1	1	0	0	0	0	1	0	0	0	1	0	0	1	1	0	0	0	2300	0	0
2	4	1005	1	0	57.1	0	1	0	0	0	0	1	1	0	0	0	0	0	1	0	0	0	0	0	2	2	0	1	0	1	0	0	0	0	1	0	1	0	2	1	1	1	1	0	0	0	5300	0	0
1	2	1005	2	0	49.83	0	0	0	0	1	0	0	1	0	0	0	1	0	0	0	0	0	0	1	2	2	0	0	1	1	0	0	0	0	1	0	1	0	2	1	1	1	1	0	0	0	5000	0	0
1	2	1005	1	0	59.7	0	0	1	1	0	0	0	0	0	0	0	0	0	0	0	0	0	0	0	2	2	0	0	1	4	0	0	0	0	0	0	1	0	1	0	0	1	1	0	0	0	2600	0	0
1	4	1005	1	0	73.91	1	1	99	1	0	0	1	0	0	0	0	0	0	1	1	0	0	0	0	2	2	0	0	1	2	0	0	0	0	1	0	0	0	1	0	0	1	1	0	0	0	2300	0	0
1	1	1005	1	0	30.99	0	1	1	0	0	1	1	0	0	0	0	0	0	1	1	0	0	0	1	2	2	0	0	1	3	0	0	0	0	1	0	1	0	2	1	0	1	1	0	0	0	5000	0	0
1	1	1005	1	0	48.59	0	1	1	1	0	0	0	0	0	0	0	1	0	0	0	0	0	0	0	2	2	0	0	1	1	0	0	0	0	1	0	1	0	2	1	0	1	1	0	0	0	5000	0	0
1	4	1005	1	0	70.95	1	1	1	1	0	0	0	0	0	0	0	0	0	0	0	0	0	1	0	2	2	0	0	1	2	0	0	0	0	1	0	0	0	1	0	0	1	1	0	0	0	2500	0	0
1	2	1005	1	0	67.78	1	1	0	1	0	1	0	1	0	0	0	1	0	0	0	0	0	0	1	2	2	0	0	1	1	0	0	0	0	1	1	0	0	2	1	1	2	2	0	0	0	10000	0	0
1	2	1005	2	0	52.57	0	1	1	1	1	0	0	0	0	0	0	1	1	0	0	0	0	0	0	2	2	0	0	1	1	0	0	0	0	1	1	0	0	2	1	0	1	1	0	0	0	2300	0	0
2	1	1005	1	0	58.02	0	0	1	0	0	0	0	0	0	0	0	1	0	0	0	0	0	1	0	2	2	0	0	1	1	0	0	0	0	1	0	0	0	1	0	1	1	1	0	0	0	5000	0	0
1	2	1005	0	0	73.39	1	0	1	1	0	0	1	0	0	0	0	0	0	0	0	0	0	1	0	2	2	0	0	1	1	0	0	0	0	1	1	0	0	2	1	0	1	1	0	0	0	2600	0	0
1	4	1005	1	0	57.63	0	1	1	1	1	1	0	0	0	0	0	1	0	0	0	0	0	1	0	2	2	0	0	1	1	0	0	0	0	1	0	0	0	1	0	1	1	1	0	0	0	5000	0	0
1	1	1005	2	0	38.13	0	1	99	99	99	1	99	1	99	99	99	1	99	1	0	0	1	1	0	2	2	0	0	1	1	0	0	0	0	1	0	0	0	1	0	1	3	2	1	0	0	8200	0	0
1	4	1005	2	0	53.05	0	0	1	1	1	1	99	1	99	99	99	0	99	99	0	0	0	0	0	2	2	0	0	1	1	0	0	0	0	0	1	1	0	2	1	0	0	0	0	0	0	0	1	0
1	2	1005	2	0	45.26	0	1	1	1	0	99	0	0	0	0	0	0	0	0	0	0	0	0	0	2	2	0	0	1	1	0	0	0	0	0	1	0	0	1	0	0	1	1	0	0	0	2600	0	0
1	2	1005	2	0	58.97	0	0	1	1	0	1	1	0	0	0	0	1	0	0	0	0	0	0	1	2	2	0	1	0	2	0	0	0	0	0	1	0	0	1	0	0	2	2	0	0	0	10000	0	0
1	2	1005	2	0	58.86	0	1	1	1	0	1	1	1	0	0	0	1	0	1	1	0	0	1	0	2	2	0	0	1	1	0	0	0	0	0	0	0	0	1	0	1	3	3	0	0	0	12500	0	0
1	2	1005	2	0	58.97	0	1	1	1	0	0	0	0	0	0	0	0	0	0	0	0	0	0	0	2	2	0	0	1	2	0	0	0	0	1	0	0	0	1	0	0	1	0	0	0	1	4800	0	0
1	1	1005	2	0	71.86	1	1	1	1	1	1	1	0	0	1	1	1	1	0	0	0	1	0	1	2	2	0	1	0	1	0	0	0	0	0	0	1	0	1	0	1	0	0	0	0	0	0	0	0
1	1	1005	2	0	64.26	1	0	1	1	0	0	0	0	0	0	0	0	0	0	0	0	0	0	0	2	2	0	1	0	2	0	0	0	0	1	0	0	0	1	0	1	0	0	0	0	0	0	0	0
1	4	1005	2	0	42.21	0	1	0	0	0	0	0	1	0	0	0	1	0	0	0	0	0	1	0	2	2	0	1	0	4	0	0	0	0	0	0	1	0	1	0	1	1	1	0	0	0	5000	0	0
1	2	1005	2	0	61.45	1	0	1	1	0	0	0	0	0	0	0	0	0	0	0	0	0	0	0	2	2	0	0	1	2	0	0	0	0	1	0	0	0	1	0	1	0	0	0	0	0	0	1	1
1	2	1005	2	0	67.79	1	1	1	1	1	1	99	1	99	99	99	0	99	99	0	0	1	1	0	2	2	0	0	1	1	0	0	0	0	0	0	1	0	1	0	1	2	2	0	0	0	10000	0	0
1	4	1005	2	0	55.12	0	1	99	0	0	0	0	1	0	0	0	0	0	1	0	0	0	0	0	2	2	0	0	1	2	0	0	0	0	0	0	1	0	1	0	1	1	1	0	0	0	5000	0	0
1	2	1005	2	0	55.1	0	1	1	1	0	0	0	0	0	0	0	1	0	1	0	0	0	0	0	2	2	0	0	1	1	0	0	0	0	0	0	1	0	1	0	0	1	1	0	0	0	2300	0	0
1	2	1005	2	0	52.01	0	1	1	0	0	0	1	0	0	0	0	0	0	0	0	0	0	0	0	2	2	0	0	1	2	0	0	0	0	1	0	1	0	2	1	0	1	1	0	0	0	4800	0	0
1	2	1005	2	0	44.57	0	1	1	1	0	0	0	1	0	0	0	0	0	1	0	0	1	1	0	2	2	0	0	1	1	0	0	0	0	1	0	0	0	1	0	1	2	2	0	0	0	10000	0	0
1	2	1005	2	0	63.07	1	0	0	1	0	0	0	0	0	0	0	1	0	0	0	0	0	0	0	2	2	0	0	1	1	0	0	0	0	1	0	0	0	1	0	1	2	1	0	1	0	18000	0	0
1	2	1005	2	0	60.69	1	1	0	0	0	0	0	0	0	0	0	0	0	0	0	0	0	0	0	2	2	0	1	0	1	0	0	0	0	1	0	0	0	1	0	0	1	1	0	0	0	5000	0	0
1	2	1005	2	0	64.55	1	0	0	1	0	1	0	0	0	0	0	0	0	0	0	0	0	0	0	2	2	0	0	1	2	0	0	0	0	1	0	0	0	1	0	1	2	1	0	1	0	18000	0	0
1	4	1005	2	0	48.52	0	1	0	0	1	0	0	0	0	0	0	0	0	0	0	0	0	0	0	2	1	0	0	1	2	0	0	0	0	1	0	0	0	1	0	1	1	1	0	0	0	4800	0	0
2	1	1005	2	0	63.03	1	0	1	1	1	0	0	0	0	0	0	1	0	0	1	0	0	0	0	2	2	0	1	0	1	0	0	0	0	0	1	0	0	1	0	1	1	0	0	0	1	4800	0	0
1	4	1005	2	0	75.07	1	0	0	1	0	0	0	0	0	0	0	0	0	0	0	0	1	0	0	2	2	0	0	1	1	0	0	0	0	1	0	0	0	1	0	1	1	1	0	0	0	2800	0	0
1	1	1005	0	0	70.01	1	0	1	0	1	0	0	0	0	0	0	1	0	0	0	0	0	0	0	2	2	0	0	1	1	0	0	0	0	1	0	0	0	1	0	1	1	1	0	0	0	8000	0	0
1	2	1005	0	0	69.44	1	0	1	1	0	0	0	0	0	0	0	1	0	0	0	0	0	0	0	2	2	0	0	1	1	0	0	0	0	1	0	0	0	1	0	1	1	1	0	0	0	5000	0	0
1	2	1005	0	0	40.51	0	0	1	0	0	0	1	0	0	0	0	0	0	0	0	0	0	0	0	2	2	0	0	1	1	0	0	0	0	0	0	1	0	1	0	0	1	1	0	0	0	2800	0	0
1	2	1005	2	0	56.8	0	1	99	0	0	0	0	0	0	0	0	0	0	1	0	0	0	0	0	2	2	0	1	0	1	0	0	0	0	1	0	0	0	1	0	1	0	0	0	0	0	0	0	0
1	1	1005	1	0	42.35	0	1	1	0	0	1	0	0	0	0	0	1	0	0	0	0	0	0	0	2	2	0	0	1	1	0	0	0	0	1	0	0	0	1	0	1	1	1	0	0	0	5000	0	0
2	4	1005	2	0	75.86	1	1	1	1	0	0	0	0	0	0	0	0	0	99	0	0	0	0	0	2	2	0	0	1	2	0	0	0	0	1	0	0	0	1	0	1	0	0	0	0	0	0	0	0
1	3	1005	2	0	65.85	1	0	1	1	1	1	99	1	99	99	99	0	99	99	0	0	0	0	0	2	2	0	0	1	1	0	0	0	0	0	0	0	0	1	0	0	1	1	0	0	0	5000	0	0
2	4	1005	2	0	73.56	1	1	1	1	0	0	0	0	0	0	0	0	0	1	0	0	0	1	0	2	2	0	0	1	1	0	0	0	0	0	1	1	0	2	1	1	1	1	0	0	0	2600	0	0
1	4	1005	2	0	42.72	0	1	1	1	0	99	0	0	0	0	0	0	0	99	0	0	0	0	0	2	2	0	0	1	1	0	0	0	0	1	0	0	0	1	0	0	1	1	0	0	0	5000	0	0
2	2	1005	2	0	72.02	1	0	1	1	0	0	1	0	0	0	0	1	0	0	0	0	0	0	0	2	2	0	1	0	2	0	0	0	0	1	1	1	0	3	1	0	1	1	0	0	0	2800	0	0
1	2	1005	2	0	68.09	1	1	1	0	1	1	0	0	0	0	0	0	0	1	1	0	0	0	0	2	2	0	0	1	3	0	0	0	0	1	1	1	0	3	1	1	1	1	0	0	0	5000	0	0
1	1	1005	2	0	44.24	0	1	0	0	0	1	1	0	0	0	0	1	0	0	0	0	0	0	0	2	2	0	0	1	1	0	0	0	0	1	0	0	0	1	0	0	2	2	0	0	0	10000	0	0
1	2	1005	0	0	61.61	1	0	1	1	0	0	1	0	0	0	0	1	0	99	0	0	0	0	0	2	2	0	0	1	1	0	0	0	0	1	0	0	0	1	0	0	1	1	0	0	0	5000	0	0
1	2	1005	0	0	39.6	0	1	99	99	99	1	99	0	0	0	0	1	0	1	0	0	0	0	1	2	2	0	0	1	3	0	0	0	0	1	0	0	0	1	0	0	1	1	0	0	0	2800	0	0
1	2	1005	0	0	60.96	1	1	1	1	0	1	0	0	0	0	0	1	0	0	0	0	0	0	0	2	2	0	0	1	1	0	0	0	0	1	1	1	0	3	1	1	0	0	0	0	0	0	1	1
1	2	1005	1	0	56.63	0	1	1	1	0	1	1	0	0	0	0	0	0	1	1	0	0	0	0	2	2	0	0	1	4	0	0	0	0	1	0	0	0	1	0	1	2	1	0	1	0	13000	0	0
1	2	1005	1	0	53.1	0	0	1	1	0	0	1	0	0	0	0	1	0	1	1	0	0	0	0	2	2	0	0	1	1	0	0	0	0	1	0	0	0	1	0	0	1	0	1	0	0	2500	0	0
1	2	1005	0	0	43.11	0	1	1	99	1	0	0	0	0	0	0	1	0	0	0	0	0	0	1	2	2	0	0	1	1	0	0	0	0	1	0	0	0	1	0	0	1	1	0	0	0	5300	0	0
2	2	1001	10	1	61.39	1	0	1	1	1	0	1	0	0	0	0	0	0	1	0	0	0	1	0	2	2	0	1	0	1	0	0	0	0	1	0	0	0	1	0	0	1	0	0	0	1	6000	0	0
1	2	1001	28	1	52.39	0	1	0	1	0	0	0	0	0	0	0	0	0	1	0	0	0	0	0	2	2	0	0	1	1	0	0	0	0	0	0	1	0	1	0	1	3	3	0	0	0	17300	0	0
1	3	1001	27	1	49.02	0	1	0	0	0	0	1	1	0	0	0	0	0	1	0	0	0	0	0	2	2	0	0	1	1	0	0	0	0	1	0	0	0	1	0	0	1	1	0	0	0	5800	0	0
1	2	1001	9	1	75.14	1	1	1	1	99	1	99	1	0	0	0	1	0	1	0	0	0	0	0	2	2	0	1	0	1	0	0	0	0	0	0	1	0	1	0	1	1	1	0	0	0	5900	0	0
1	2	1001	2	0	60.77	1	1	1	0	0	0	0	1	0	0	0	0	0	0	0	0	0	1	1	2	2	0	1	0	3	0	0	0	0	1	0	0	0	1	0	0	1	1	0	0	0	5900	0	0
1	1	1001	2	0	75.47	1	0	1	1	1	0	0	1	99	99	99	1	0	0	0	0	0	0	0	2	2	0	1	0	2	0	0	0	0	1	0	0	0	1	0	1	2	2	0	0	0	11800	0	0
2	1	1001	2	0	67.67	1	0	1	1	1	0	1	1	0	0	0	0	0	0	1	0	1	0	1	2	2	0	1	0	1	0	0	0	0	1	0	0	0	1	0	1	3	3	0	0	0	14900	0	0
2	1	1001	2	0	72.65	1	0	1	1	1	0	0	0	0	0	0	0	0	0	0	0	1	0	1	2	2	0	1	0	2	0	0	0	0	1	0	0	0	1	0	1	1	1	0	0	0	4500	0	0
2	3	1001	2	0	72.06	1	0	1	1	1	1	0	1	0	0	0	0	0	0	0	0	0	1	0	2	2	0	0	1	1	0	0	0	0	0	1	0	0	1	0	1	2	2	0	0	0	10800	0	0
2	1	1001	2	0	57.01	0	0	1	1	0	1	1	0	0	0	0	1	0	0	1	0	0	1	0	2	2	0	0	1	1	0	0	0	0	1	0	0	0	1	0	1	1	1	0	0	0	5900	0	0
1	3	1001	2	0	60.08	1	0	1	1	1	1	0	0	0	0	0	0	0	0	0	0	0	0	0	2	2	0	0	1	1	0	0	0	0	0	0	1	0	1	0	0	1	1	0	0	0	4500	0	0
1	3	1001	4	1	64.34	1	1	1	99	1	1	99	1	0	0	0	1	0	99	0	0	0	0	1	2	2	0	0	1	1	0	0	0	0	1	0	0	0	1	0	1	1	1	0	0	0	5900	0	0
1	1	1001	8	1	42.18	0	0	1	99	1	1	1	0	0	0	0	1	0	1	1	0	0	1	1	2	2	0	1	0	2	0	0	0	0	1	0	0	0	1	0	0	1	1	0	0	0	10000	0	0
1	3	1001	1	0	56.8	0	1	1	1	1	0	1	0	0	0	0	0	0	0	0	0	0	0	0	2	2	0	0	1	1	0	0	0	0	0	1	0	0	1	0	1	1	1	0	0	0	10000	0	0
2	2	1001	2	0	74.77	1	1	1	1	1	0	0	0	0	0	0	1	0	0	0	0	0	0	0	2	2	0	0	1	3	0	0	0	0	0	1	0	0	1	0	1	1	1	0	0	0	4500	0	0
1	3	1001	2	0	55.96	0	0	1	0	0	0	1	0	0	0	0	0	0	1	1	0	0	1	0	2	2	0	0	1	3	0	0	0	0	0	1	0	0	1	0	0	1	0	0	0	1	6000	0	0
1	2	1001	3	0	43.23	0	0	1	1	1	1	0	0	0	0	0	0	0	0	1	0	0	1	1	2	2	0	0	1	2	0	0	0	0	1	0	0	0	1	0	1	1	1	0	0	0	10000	0	0
1	1	1001	2	0	49.85	0	1	1	1	0	0	1	1	0	0	0	1	0	0	0	0	0	0	1	2	2	0	0	1	1	0	0	0	0	0	0	1	0	1	0	1	2	1	0	0	1	10800	0	0
1	1	1001	2	0	29.69	0	1	99	0	0	99	0	1	0	0	0	1	0	0	0	0	0	0	1	1	2	0	0	1	2	0	0	0	0	1	0	0	0	1	0	0	1	1	0	0	0	4500	0	0
1	3	1001	1	0	63.53	1	1	99	1	99	0	0	0	0	0	0	0	0	0	0	0	1	0	0	2	2	0	0	1	2	0	0	0	0	1	0	0	0	1	0	0	1	1	0	0	0	4500	0	0
1	2	1001	57	1	85.77	1	1	1	0	1	0	1	0	0	0	0	1	0	1	1	0	0	1	0	2	2	0	0	1	2	0	0	0	0	0	1	0	0	1	0	1	2	2	0	0	0	5401	0	0
1	1	1001	11	1	48.05	0	1	1	1	0	0	0	0	0	0	0	1	0	1	0	0	0	0	0	2	2	0	0	1	1	0	0	0	0	0	0	1	0	1	0	1	3	3	0	0	0	14300	0	0
1	3	1001	16	1	55.33	0	1	0	0	0	0	0	0	0	0	0	1	0	0	0	0	99	0	1	2	2	0	0	1	2	0	0	0	0	0	0	1	0	1	0	1	1	1	0	0	0	5900	0	0
1	3	1001	1	0	58.55	0	1	1	0	0	0	0	0	0	0	0	0	0	0	0	0	99	0	0	2	2	0	0	1	2	0	0	0	0	1	0	0	0	1	0	1	2	2	0	0	0	11800	0	0
2	1	1001	0	0	66.44	1	0	1	1	1	0	0	1	0	0	0	1	0	1	0	0	1	1	1	1	1	0	1	0	2	0	0	0	1	1	0	0	0	1	0	1	2	2	0	0	0	11600	0	0
1	1	1001	7	1	50.97	0	1	1	1	1	1	0	1	0	0	0	1	0	0	1	0	0	1	0	2	2	0	1	1	1	0	0	0	0	0	0	1	0	1	0	1	3	3	0	0	0	17400	0	0
1	1	1001	7	1	68.53	1	1	1	1	0	1	1	0	0	0	0	0	0	1	1	0	0	0	0	2	2	0	1	0	2	0	0	0	0	0	1	0	0	1	0	0	1	1	0	0	0	5800	0	0
1	3	1001	35	1	51.95	0	0	0	0	1	0	0	0	0	0	0	1	0	0	1	0	0	0	0	2	2	0	1	1	1	0	0	0	0	1	0	0	0	1	0	0	1	1	0	0	0	5900	0	0
2	1	1001	31	1	48.09	0	0	1	1	0	1	1	0	0	0	0	1	0	1	0	0	0	0	1	2	2	0	0	1	1	0	0	0	0	1	0	0	0	1	0	0	1	1	0	0	0	5900	0	0
1	1	1001	19	1	66.3	1	0	1	1	0	0	1	0	0	0	0	1	1	0	0	0	1	1	0	2	2	0	0	1	3	0	0	0	0	1	0	0	0	1	0	0	1	1	0	0	0	4500	0	0
2	1	1001	19	1	66.25	1	0	1	1	1	1	1	1	0	0	0	1	0	0	1	0	1	1	0	2	2	0	0	1	2	0	0	0	0	0	1	0	0	1	0	1	1	1	0	0	0	4500	0	0
2	3	1001	32	1	59.67	0	1	1	1	1	0	1	0	0	0	0	1	0	0	0	0	1	1	0	2	2	0	0	1	3	0	0	0	0	0	0	1	0	1	0	0	1	1	0	0	0	4800	0	0
1	1	1001	6	1	55.36	0	1	0	1	1	0	0	1	0	0	0	0	0	1	0	0	1	1	1	2	2	0	1	0	2	0	0	0	0	0	0	1	0	1	0	1	2	2	0	0	0	10000	0	0
2	3	1001	20	1	61.05	1	0	1	1	0	99	0	1	99	99	99	1	99	99	0	0	0	1	1	2	2	0	1	0	1	0	0	0	1	0	1	0	0	1	0	1	2	1	1	0	0	7900	0	0
2	2	1001	3	0	62.4	1	1	1	1	1	1	0	0	0	0	0	0	0	99	0	0	0	0	1	2	2	0	0	1	2	0	0	0	0	0	0	1	0	1	0	1	2	0	2	0	0	4400	0	0
1	3	1001	8	1	53.12	0	1	0	0	0	0	0	0	0	0	0	1	0	0	0	0	99	0	0	2	2	0	0	1	1	0	0	0	0	0	1	0	0	1	0	1	1	1	0	0	0	4500	0	0
2	2	1001	22	1	38.53	0	1	1	1	0	1	1	1	0	0	0	0	0	1	0	0	1	1	1	2	2	0	1	0	1	0	0	0	0	1	0	0	0	1	0	0	1	0	0	0	1	6000	0	0
1	1	1001	16	1	52	0	1	1	1	1	1	1	0	0	0	0	1	0	1	0	0	1	1	0	2	2	0	1	0	6	0	0	0	0	0	1	0	0	1	0	1	1	1	0	0	0	4500	0	0
1	3	1001	39	1	56.41	0	1	1	1	0	1	0	0	0	0	0	1	0	0	0	0	0	1	1	2	1	0	1	0	1	0	0	0	0	1	1	1	0	3	1	1	2	2	0	0	0	10800	0	0
2	3	1001	2	0	49.98	0	1	0	0	1	0	0	1	0	0	0	0	0	1	0	0	0	1	1	2	2	0	1	0	1	0	0	0	1	1	0	0	0	1	0	0	1	1	0	0	0	5900	0	0
1	1	1001	2	0	51.51	0	1	1	1	1	0	0	0	0	0	0	1	0	0	0	0	0	0	0	2	2	0	0	1	1	0	0	0	0	0	1	0	0	1	0	99	1	1	0	0	0	5900	0	0
2	2	1001	2	0	43.25	0	1	1	0	0	0	0	1	0	0	0	1	0	0	0	0	0	0	1	2	2	0	0	1	1	0	0	0	0	0	0	1	0	1	0	1	1	1	0	0	0	4500	0	0
1	1	1001	9	1	58.14	0	1	1	1	0	0	0	0	0	0	0	0	0	1	0	0	0	0	0	2	2	0	0	1	1	0	0	0	0	1	0	0	0	1	0	0	2	2	0	0	0	9800	0	0
1	1	1001	7	1	68.15	1	0	1	0	0	0	0	0	0	0	0	0	0	1	0	0	1	1	0	2	2	0	0	1	2	0	0	0	0	0	1	0	0	1	0	0	1	1	0	0	0	4500	0	0
1	1	1001	25	1	69.65	1	0	0	1	1	0	1	0	0	0	0	0	0	0	1	0	1	1	0	2	2	0	1	0	1	0	0	0	0	0	0	1	0	1	0	1	1	1	0	0	0	5000	0	0
1	3	1001	10	1	60.97	1	0	1	1	0	0	1	0	0	0	0	1	0	1	0	0	0	1	0	2	2	0	1	0	1	0	0	0	0	1	0	0	0	1	0	0	1	0	0	0	1	6000	0	0
2	1	1001	50	1	50.22	0	1	1	1	1	0	0	0	0	0	0	1	0	1	0	0	0	0	0	2	2	0	0	1	2	0	0	0	0	0	1	0	0	1	0	1	1	1	0	0	0	5000	0	0
1	1	1001	64	1	61.73	1	1	0	1	1	0	0	0	0	0	0	1	0	1	1	0	0	1	1	2	2	0	1	0	1	0	0	0	0	0	0	1	0	1	0	0	1	1	0	0	0	4900	0	0
1	1	1001	11	1	48.54	0	1	0	1	1	1	0	1	0	0	1	0	0	0	0	0	0	0	0	2	2	0	1	0	1	0	0	0	0	1	0	0	0	1	0	1	1	1	0	0	0	4500	0	0
1	2	1001	11	1	48.3	0	0	99	99	99	99	1	0	0	0	0	1	0	99	0	0	1	1	0	2	2	0	0	1	4	0	0	0	0	0	1	0	0	1	0	0	2	2	0	0	0	10000	0	0
1	2	1001	64	1	63.75	1	0	1	1	0	1	1	1	0	0	1	0	0	1	1	0	0	1	0	2	2	0	1	0	1	0	0	0	0	1	0	0	0	1	0	1	2	2	0	0	0	9400	0	0
1	1	1001	60	1	62.38	1	1	0	0	1	0	0	0	0	0	0	1	0	0	0	0	0	0	0	2	2	0	0	1	2	0	0	0	0	0	0	1	0	1	0	1	1	1	0	0	0	5900	0	0
2	2	1001	11	1	63.12	1	1	0	0	0	0	1	0	0	0	0	1	0	1	1	0	0	1	0	2	2	0	0	1	2	0	0	0	0	1	0	0	0	1	0	0	1	0	0	0	1	6000	0	0
1	3	1001	52	1	61.71	1	0	0	0	0	0	0	1	0	0	0	0	0	0	0	0	0	0	1	2	2	0	0	1	2	0	0	0	0	0	1	1	0	2	1	1	1	1	0	0	0	4500	0	0
1	1	1001	2	0	54.75	0	1	1	1	1	0	1	0	0	0	0	1	0	1	1	0	0	1	0	2	2	0	0	1	2	0	0	0	0	0	0	1	0	1	0	0	1	1	0	0	0	4500	0	0
1	2	1001	2	0	38.71	0	1	0	0	99	0	1	0	1	0	0	1	0	0	1	0	1	1	0	2	2	0	0	1	2	0	0	0	0	0	1	0	0	1	0	1	1	1	0	0	0	5500	0	0
1	1	1001	3	0	49.74	0	1	1	1	1	0	1	0	0	0	0	1	0	1	1	0	1	0	0	1	2	0	0	1	1	0	0	0	0	0	0	1	0	1	0	1	1	1	0	0	0	5500	0	0
1	1	1001	2	0	49.95	0	1	1	1	0	0	99	0	0	0	0	0	0	0	1	0	0	0	0	2	2	0	1	0	2	0	0	0	0	0	1	0	0	1	0	0	2	2	0	0	0	11500	0	0
1	1	1001	3	0	88.51	1	1	0	1	99	0	0	0	0	0	1	0	0	0	0	0	1	0	0	2	2	0	0	1	1	0	0	0	0	0	0	1	0	1	0	1	1	1	0	0	0	5900	0	0
1	2	1001	2	0	47.2	0	1	1	1	99	0	1	0	0	0	0	1	0	0	1	0	0	0	0	2	2	0	0	1	2	0	0	0	0	0	1	1	0	2	1	1	1	1	0	0	0	4500	0	0
1	1	1001	2	0	66.13	1	1	1	1	0	0	1	0	0	0	0	0	0	0	1	0	0	1	0	2	2	0	0	1	3	0	0	0	0	1	0	0	0	1	0	1	1	1	0	0	0	5800	0	0
1	1	1001	3	0	53.57	0	1	1	1	1	1	99	1	99	99	1	0	99	99	0	0	0	0	0	2	1	0	1	0	1	0	0	0	0	1	0	0	0	1	0	1	1	1	0	0	0	5500	0	0
1	1	1001	4	1	52.77	0	1	0	1	1	1	99	1	0	0	99	0	99	1	1	0	0	1	1	2	2	0	1	0	1	0	0	0	0	0	0	1	0	1	0	1	3	3	0	0	0	17700	0	0
2	3	1001	2	0	68.02	1	0	1	1	1	0	0	1	0	0	0	1	0	0	0	0	0	0	0	2	2	0	1	0	5	0	0	0	0	0	0	1	0	1	0	0	1	1	0	0	0	5900	0	0
1	3	1001	2	0	54.63	0	1	1	1	1	1	1	0	0	0	0	1	0	0	1	0	0	0	0	2	2	0	0	1	1	0	0	0	0	0	0	1	0	1	0	0	1	1	0	0	0	4900	0	0
1	3	1001	2	0	53.97	0	1	1	0	1	0	1	0	0	0	0	1	0	0	1	0	1	1	0	2	2	0	1	0	2	0	0	0	0	0	1	0	0	1	0	1	1	1	0	0	0	4500	0	0
1	1	1001	2	0	80.8	1	1	1	0	0	99	0	0	0	0	1	0	0	0	0	0	1	1	1	2	2	0	1	0	2	0	0	0	0	0	1	0	0	1	0	1	2	2	0	0	0	10400	0	0
2	1	1001	2	0	54.9	0	0	1	1	1	1	99	1	99	99	99	1	99	99	0	0	0	1	0	2	1	0	0	1	2	0	0	0	0	0	0	1	0	1	0	1	0	0	0	0	0	0	1	1
1	3	1001	2	0	58.98	0	0	1	1	99	1	1	0	0	0	0	0	0	1	1	0	0	1	0	2	2	0	0	1	2	0	0	0	0	0	1	0	0	1	0	1	1	1	0	0	0	4500	0	0
1	2	1001	1	0	50.39	0	1	1	1	1	1	1	0	0	0	0	1	0	1	1	0	0	1	0	2	2	0	0	1	1	0	0	0	0	0	0	1	0	1	0	99	1	1	0	0	0	5500	0	0
1	2	1001	3	0	71.26	1	1	1	1	1	0	1	1	0	0	0	0	0	0	0	0	0	1	0	2	2	0	1	0	2	0	0	0	0	0	0	1	0	1	0	1	3	3	0	0	0	14000	0	0
1	3	1001	2	0	45.57	0	1	1	1	0	0	1	1	0	0	0	1	0	0	1	0	1	1	0	2	2	0	0	1	3	0	0	0	0	1	0	0	0	1	0	1	2	2	0	0	0	9800	0	0
1	2	1001	2	0	54.57	0	1	1	1	1	0	0	0	0	0	0	1	0	99	0	0	0	0	0	2	2	0	0	1	1	0	0	0	0	0	1	0	0	1	0	1	1	1	0	0	0	4500	0	0
1	3	1001	2	0	62.65	1	1	1	99	1	1	0	0	0	0	0	1	0	99	0	0	0	0	0	2	2	0	0	1	2	0	0	0	0	0	0	1	0	1	0	1	1	1	0	0	0	5000	0	0
1	1	1001	2	0	66.3	1	1	1	1	1	1	1	1	0	0	0	1	0	1	1	0	0	1	0	2	2	0	0	1	2	0	0	0	0	0	1	0	0	1	0	0	1	1	0	0	0	5800	0	0
1	3	1001	2	0	53.31	0	0	1	1	1	0	1	0	0	0	0	1	0	0	1	0	0	1	0	2	2	0	0	1	1	0	0	0	0	0	1	0	0	1	0	0	1	1	0	0	0	5500	0	0
2	3	1001	2	0	62.73	1	0	1	1	1	1	1	1	0	0	1	1	0	0	0	0	0	0	0	2	1	0	1	0	1	0	0	0	0	1	0	0	0	1	0	1	2	2	0	0	0	11800	0	0
2	3	1001	3	0	67.4	1	0	1	1	1	1	1	0	0	0	0	1	0	1	1	0	1	1	0	2	2	0	1	0	2	0	0	0	0	0	1	0	0	1	0	1	1	1	0	0	0	4500	0	0
1	1	1001	3	0	64.96	1	1	0	0	0	0	1	0	0	0	0	0	0	1	1	0	0	1	0	2	2	0	0	1	2	0	0	0	0	0	0	1	0	1	0	0	1	0	1	0	0	2100	0	0
1	2	1001	2	0	74.18	1	1	1	1	1	0	0	0	0	0	0	1	0	1	0	0	0	1	1	2	1	0	0	1	1	0	0	0	0	1	0	0	0	1	0	0	1	1	0	0	0	4500	0	0
1	2	1001	2	0	44.48	0	1	1	1	0	0	1	0	0	0	1	1	0	0	1	0	0	1	0	2	1	0	1	0	1	0	0	0	0	0	0	1	0	1	0	0	1	0	1	0	0	2300	0	0
1	1	1001	2	0	70.16	1	1	1	1	1	0	1	0	0	0	0	1	0	0	0	0	0	1	0	2	2	0	0	1	1	0	0	0	0	1	0	1	0	2	1	0	1	1	0	0	0	5900	0	0
1	2	1001	6	1	74.74	1	1	1	1	1	0	0	0	0	0	0	0	0	0	0	0	0	0	0	2	2	0	1	0	2	0	0	0	0	0	1	0	0	1	0	0	1	1	0	0	0	4500	0	0
1	2	1001	2	0	62.14	1	1	0	1	0	0	0	0	0	0	0	0	0	0	0	0	1	1	0	2	2	0	0	1	1	0	0	0	0	0	1	0	0	1	0	0	1	1	0	0	0	4900	0	0
1	2	1001	2	0	70.55	1	0	1	1	0	0	0	0	0	0	0	0	0	0	0	0	1	0	0	2	2	0	0	1	1	0	0	0	0	0	0	1	0	1	0	1	1	1	0	0	0	5500	0	0
1	3	1001	2	0	52.64	0	1	1	1	1	0	0	0	0	0	0	1	0	0	1	0	1	1	0	2	2	0	1	0	1	0	0	0	0	0	1	0	0	1	0	1	1	1	0	0	0	4900	0	0
1	2	1001	2	0	66.6	1	1	0	0	0	0	1	0	0	0	0	0	1	1	0	0	0	1	0	2	2	0	0	1	3	0	0	0	0	0	0	0	1	1	0	1	1	1	0	0	0	5000	0	0
1	2	1001	2	0	45.85	0	0	0	0	0	0	1	0	0	0	0	0	0	0	0	0	0	1	0	2	2	0	1	0	1	0	0	0	0	1	0	0	0	1	0	1	1	1	0	0	0	4500	0	0
2	1	1001	1	0	57.45	0	0	0	1	0	0	1	0	0	0	0	1	0	1	0	0	0	1	1	2	2	0	0	1	2	0	0	0	0	0	0	1	0	1	0	0	1	1	0	0	0	5000	0	0
1	3	1001	3	0	59.61	0	0	1	1	1	0	1	1	0	0	0	1	0	1	1	0	1	1	1	2	2	0	0	1	2	0	0	0	0	1	0	0	0	1	0	1	1	1	0	0	0	4500	0	0
1	1	1001	3	0	53.33	0	1	1	1	1	1	1	0	0	0	0	1	0	1	0	0	1	0	0	2	2	0	0	1	3	0	0	0	0	0	0	1	0	1	0	1	2	2	0	0	0	9000	0	0
2	2	1001	1	0	60.9	1	0	0	0	1	1	0	1	0	1	0	1	0	1	0	0	0	1	1	2	2	0	0	1	1	0	0	0	0	1	0	0	0	1	0	1	1	1	0	0	0	5900	0	0
1	1	1001	2	0	58.01	0	1	1	1	0	0	1	0	0	0	0	0	0	1	1	0	0	1	0	2	2	0	0	1	1	0	0	0	0	1	0	0	0	1	0	1	1	1	0	0	0	5900	0	0
2	2	1001	2	0	74.67	1	0	1	1	1	0	1	0	0	0	0	0	0	0	1	0	1	0	0	2	2	0	1	0	1	0	0	0	0	0	0	1	0	1	0	1	3	1	0	0	2	15500	0	0
1	1	1001	2	0	30.45	0	1	0	0	0	0	0	0	0	0	0	1	0	1	0	0	0	0	0	2	2	0	1	0	1	0	0	0	0	1	0	1	0	2	1	0	2	2	0	0	0	9900	0	0
1	2	1001	3	0	69.68	1	0	1	1	0	0	1	0	0	0	0	0	0	1	1	0	0	1	1	2	2	0	0	1	2	0	0	0	0	1	0	0	0	1	0	1	2	2	0	0	0	9000	1	0
1	2	1001	2	0	64.37	1	0	1	1	1	0	0	0	0	0	0	1	0	0	0	0	1	1	0	2	2	0	0	1	1	0	0	0	0	1	0	0	0	1	0	0	1	1	0	0	0	4900	0	0
2	3	1001	2	0	67.59	1	0	1	0	1	0	1	0	0	0	0	0	0	0	0	0	0	1	1	2	2	0	0	1	3	0	0	0	0	0	0	1	0	1	0	0	1	0	0	0	1	6000	0	0
1	1	1001	2	0	35.43	0	1	1	1	0	0	1	0	0	0	0	1	0	1	1	0	0	0	0	2	2	0	1	0	2	0	0	0	0	0	0	1	0	1	0	1	2	0	0	0	2	11000	0	0
1	1	1001	2	0	39.83	0	1	1	1	0	0	1	0	0	0	0	1	0	1	1	0	0	0	1	2	2	0	1	0	2	0	0	0	0	0	1	0	0	1	0	1	2	0	0	0	2	12000	0	0
1	1	1001	5	1	48.82	0	1	1	1	0	0	1	1	0	0	0	1	0	1	1	0	0	1	1	2	2	0	0	1	2	0	0	0	0	1	0	0	0	1	0	0	1	1	0	0	0	5000	0	0
2	3	1001	2	0	62.22	1	0	1	1	1	1	1	0	0	0	0	0	0	1	1	0	0	0	0	2	2	0	1	0	2	0	0	0	0	0	1	0	0	1	0	0	3	1	0	0	2	16800	0	0
2	1	1001	6	1	72.76	1	0	1	1	0	1	0	0	0	0	0	1	0	0	0	0	0	1	0	2	2	0	0	1	3	0	0	0	0	1	0	0	0	1	0	1	3	2	0	0	1	17600	0	0
1	3	1001	2	0	55.84	0	1	1	1	0	0	1	0	0	0	0	1	0	0	1	0	0	1	0	2	1	0	1	1	2	0	0	0	0	0	1	1	0	2	1	1	2	0	0	0	2	12000	0	0
1	2	1001	33	1	71.89	1	1	1	1	1	0	1	0	0	0	0	0	0	0	0	0	0	0	0	2	2	0	0	1	1	0	0	0	0	1	0	0	0	1	0	1	0	0	0	0	0	0	0	1
1	1	1001	2	0	61.27	1	0	1	0	0	1	0	0	0	0	0	1	0	0	1	0	1	1	0	2	2	0	0	1	1	0	0	0	0	0	0	1	0	1	0	0	2	2	0	0	0	10000	0	0
1	3	1001	3	0	48.26	0	1	1	1	0	0	0	0	0	0	0	1	0	0	0	0	0	0	0	2	2	0	1	0	2	0	0	0	0	0	1	0	0	1	0	0	1	1	0	0	0	4500	0	0
1	3	1001	2	0	64.97	1	0	1	1	99	0	0	1	99	0	0	1	1	1	0	0	0	1	0	2	2	0	1	0	1	0	0	0	0	1	0	0	0	1	0	1	1	1	0	0	0	5900	0	0
1	1	1001	2	0	58.02	0	1	1	1	1	1	1	0	0	0	0	1	0	1	1	0	0	1	0	2	2	0	0	1	3	0	0	0	0	0	0	1	0	1	0	1	1	1	0	0	0	4500	0	0
2	3	1001	6	1	48.06	0	0	0	0	0	0	1	0	0	0	0	1	0	0	1	0	0	0	1	2	2	0	0	1	1	0	0	0	0	0	0	1	0	1	0	0	1	0	0	0	1	6000	0	0
1	3	1001	2	0	60.01	1	1	1	1	1	0	0	0	0	0	0	1	0	0	0	0	0	1	0	2	2	0	0	1	1	0	0	0	0	0	0	1	0	1	0	0	0	0	0	0	0	0	0	0
1	3	1001	20	1	51.18	0	1	0	0	0	0	0	0	0	0	0	1	0	0	0	0	0	1	0	2	2	0	1	0	1	0	0	0	0	0	1	0	0	1	0	1	1	1	0	0	0	4900	0	0
1	2	1001	3	0	78.17	1	1	1	1	0	0	1	0	0	0	0	1	0	0	1	0	0	0	0	2	2	0	1	0	1	0	0	0	0	0	0	1	0	1	0	1	3	3	0	0	0	17700	0	0
1	3	1001	3	0	46.11	0	0	1	1	0	0	1	1	0	0	0	0	0	1	1	0	0	1	1	2	2	0	1	0	1	0	0	0	0	1	0	0	0	1	0	0	1	1	0	0	0	5000	0	0
1	1	1001	2	0	53.76	0	0	1	1	1	0	0	0	1	0	0	0	1	1	0	0	0	1	0	2	2	0	1	0	1	0	0	0	0	0	0	1	0	1	0	1	1	1	0	0	0	6000	0	0
1	3	1001	2	0	60.51	1	1	1	1	1	1	1	0	0	0	0	1	0	1	1	0	1	0	0	2	2	0	0	1	2	0	0	0	0	0	1	1	0	2	1	1	1	1	0	0	0	5500	0	0
2	1	1001	3	0	77.23	1	1	1	1	0	0	1	1	0	0	0	0	0	0	0	0	0	1	0	2	2	0	0	1	1	0	0	0	0	1	0	0	0	1	0	1	2	2	0	0	0	11800	0	0
1	1	1001	5	1	37.63	0	0	0	0	0	0	0	0	0	0	0	0	0	1	0	0	0	1	0	2	2	0	0	1	2	0	0	0	0	0	0	1	0	1	0	1	1	1	0	0	0	5900	0	0
2	2	1001	2	0	49.46	0	1	0	0	0	1	0	0	1	0	0	0	0	0	0	0	0	0	0	2	2	0	0	1	4	0	0	0	0	0	0	1	0	1	0	0	1	0	0	0	1	6000	0	0
1	3	1001	2	0	52.22	0	1	1	1	1	1	0	0	0	0	1	0	0	0	1	0	1	0	0	2	2	0	1	0	3	0	0	0	0	0	0	1	0	1	0	1	2	2	0	0	0	10000	0	0
1	3	1001	2	0	56.18	0	0	1	0	0	1	0	0	0	0	0	1	0	0	0	0	0	1	0	2	2	0	0	1	2	0	0	0	0	1	1	1	0	3	1	1	2	2	0	0	0	9800	0	0
1	2	1001	2	0	66.77	1	0	1	1	1	0	0	0	0	0	0	1	0	0	0	0	0	1	0	2	2	0	0	1	2	0	0	0	0	1	0	0	0	1	0	0	1	1	0	0	0	4900	0	0
2	1	1001	3	0	59.93	0	0	1	1	1	1	1	0	0	0	0	1	0	0	1	0	0	1	0	2	1	0	1	0	2	0	0	0	0	1	0	0	0	1	0	0	1	0	0	0	1	6000	0	0
2	1	1001	3	0	70.88	1	0	1	1	1	0	1	0	0	0	1	0	0	1	0	0	1	1	0	2	2	0	1	0	1	0	0	0	0	1	0	0	0	1	0	1	2	2	0	0	0	9000	0	0
1	3	1001	2	0	56.48	0	1	1	1	1	0	1	1	0	0	0	0	0	0	1	0	0	1	0	2	1	0	1	0	1	0	0	0	0	1	1	0	0	2	1	0	1	0	0	0	1	6000	0	0
2	2	1001	2	0	49.54	0	0	1	0	0	1	1	0	0	0	0	0	0	0	1	0	1	1	0	2	2	0	0	1	1	0	0	0	0	1	0	0	0	1	0	1	2	0	0	2	0	20000	0	0
2	3	1001	1	0	73.59	1	0	1	1	1	0	0	1	0	0	0	0	1	0	1	0	1	1	1	2	2	0	0	1	1	0	0	0	0	1	1	0	1	3	1	1	1	1	0	0	0	5500	0	0
2	1	1001	1	0	58.22	0	0	1	1	0	0	0	0	1	0	0	1	1	0	0	0	0	1	0	2	2	0	0	1	1	0	0	0	0	1	0	0	0	1	0	1	1	0	0	0	1	6000	0	0
1	1	1001	16	1	61.23	1	1	99	1	99	0	1	0	0	0	0	1	0	1	1	0	0	0	0	2	2	0	0	1	2	0	0	0	0	0	1	0	0	1	0	1	1	1	0	0	0	5000	0	0
2	1	1001	7	1	55.44	0	0	1	1	1	0	0	0	0	0	0	0	0	0	0	0	0	0	0	2	2	0	0	1	2	0	0	0	0	1	0	0	0	1	0	1	1	1	0	0	0	5800	0	0
2	3	1001	2	0	60.59	1	0	1	1	1	0	0	0	0	0	0	0	0	0	0	0	0	0	0	2	2	0	1	0	1	0	0	0	0	1	0	0	0	1	0	0	1	1	0	0	0	4900	0	0
2	4	1001	2	0	56.97	0	0	1	1	1	1	0	0	0	0	0	1	0	0	0	0	0	0	0	2	2	0	0	1	1	0	0	0	0	1	0	0	0	1	0	0	1	1	0	0	0	5900	0	0
1	3	1001	4	1	62.63	1	0	0	1	0	0	1	0	0	0	0	1	0	0	0	0	0	0	1	2	2	0	1	0	1	0	0	0	0	1	0	0	0	1	0	0	3	1	0	0	2	14500	0	0
2	1	1001	3	0	77.77	1	0	1	1	0	0	1	1	0	0	0	0	0	0	1	0	0	1	0	2	2	0	0	1	2	0	0	0	0	1	0	0	0	1	0	0	1	1	0	0	0	4500	0	0
1	1	1001	2	0	51.01	0	0	1	1	0	0	1	0	0	0	0	1	0	0	1	0	0	0	0	2	2	0	1	0	1	0	0	0	0	1	0	0	0	1	0	0	2	0	0	0	2	11000	0	0
1	3	1001	2	0	72.54	1	0	99	99	0	0	1	1	0	0	0	0	0	1	1	0	0	0	0	2	2	0	0	1	2	0	0	0	0	1	0	0	0	1	0	0	1	0	0	0	1	6000	0	0
2	1	1001	3	0	68.21	1	0	1	0	1	0	1	0	0	0	1	1	0	0	1	0	1	1	0	2	2	0	1	0	1	0	0	0	0	0	1	0	0	1	0	0	1	1	0	0	0	5000	0	0
2	2	1001	3	0	74.98	1	0	1	1	1	0	1	0	0	0	1	0	0	0	1	0	0	0	0	2	2	0	1	0	2	0	0	0	0	0	0	1	0	1	0	1	3	1	0	0	2	15000	0	0
1	2	1001	2	0	44.61	0	1	1	1	0	0	1	0	0	0	1	1	0	0	1	0	1	1	0	2	2	0	0	1	2	0	0	0	0	0	0	1	0	1	0	0	2	0	0	0	2	11000	0	0
2	1	1001	2	0	61.7	1	0	1	1	1	1	1	0	0	0	0	1	0	0	1	0	0	0	0	2	2	0	1	0	1	0	0	0	0	0	1	0	0	1	0	1	2	0	0	0	2	11000	0	0
1	1	1001	2	0	61.51	1	1	1	1	1	1	1	1	0	0	0	1	99	1	1	1	1	1	0	2	2	0	1	1	2	0	0	0	0	0	0	1	0	1	0	1	3	3	0	0	0	13500	0	0
1	2	1001	4	1	63.7	1	1	1	1	99	1	1	1	0	0	0	1	0	0	1	0	1	1	0	2	2	0	1	1	1	0	0	0	0	1	0	0	0	1	0	1	3	3	0	0	0	13500	0	0
2	1	1001	1	0	74.83	1	0	1	1	1	1	1	1	0	0	0	0	0	0	1	0	0	1	1	2	2	0	1	0	1	0	0	0	0	1	0	0	0	1	0	0	1	1	0	0	0	5000	0	0
1	2	1001	9	1	44.59	0	1	1	1	0	1	0	0	0	0	0	1	0	1	0	0	0	1	1	2	2	0	0	1	3	0	0	0	0	0	1	0	0	1	0	1	1	0	0	0	1	6000	0	0
1	1	1001	3	0	49.99	0	1	1	1	99	0	0	0	0	0	0	1	0	0	0	0	0	1	1	1	2	0	0	1	2	0	0	0	0	0	0	1	0	1	0	0	1	1	0	0	0	5900	0	0
2	2	1001	2	0	53.55	0	0	1	0	0	0	0	0	0	0	0	1	0	0	0	0	0	0	0	2	2	0	0	1	1	0	0	0	0	1	0	0	0	1	0	0	1	1	0	0	0	4500	0	0
1	1	1001	9	1	69.95	1	1	1	99	99	1	99	0	0	0	0	0	0	1	0	0	1	1	0	2	2	0	1	0	2	0	0	0	0	0	0	1	0	1	0	1	0	0	0	0	0	0	1	1
1	3	1001	3	0	55.48	0	1	0	1	1	1	0	0	0	0	0	1	0	0	0	0	0	0	0	2	2	0	0	1	3	0	0	0	0	0	0	1	0	1	0	0	0	0	0	0	0	0	0	0
1	2	1001	1	0	63.44	1	1	1	1	99	1	1	0	0	0	0	1	0	1	1	0	0	0	0	2	2	0	0	1	1	0	0	0	0	0	1	0	0	1	0	0	1	1	0	0	0	5900	0	0
1	2	1001	2	0	71.34	1	1	1	1	1	0	0	0	0	0	0	0	0	0	1	0	0	1	0	2	2	0	0	1	4	0	0	0	0	1	0	0	0	1	0	1	0	0	0	0	0	0	1	1
1	1	1001	1	0	58.51	0	1	99	99	99	1	1	1	0	0	0	0	0	1	1	0	0	0	0	2	2	0	0	1	2	0	0	0	0	0	0	1	0	1	0	1	2	2	0	0	0	11800	0	0
2	3	1001	2	0	67.69	1	0	1	0	1	0	1	0	0	0	0	0	0	0	1	0	0	1	0	2	2	0	0	1	1	0	0	0	0	0	0	1	0	1	0	1	2	2	0	0	0	11000	0	0
1	1	1001	4	1	51.59	0	1	0	0	0	0	1	1	0	0	0	1	0	0	1	0	0	0	0	2	2	0	0	1	1	0	0	0	0	0	0	1	0	1	0	99	1	0	0	0	1	6000	0	0
2	1	1001	23	1	61.92	1	1	0	1	0	1	0	1	0	0	0	1	0	0	0	0	0	1	0	2	2	0	0	1	1	0	0	0	0	1	0	0	0	1	0	1	0	0	0	0	0	0	1	1
2	1	1001	2	0	77.31	1	1	99	1	0	0	1	1	0	0	0	0	0	0	1	0	1	1	0	2	2	0	0	1	1	0	0	0	0	0	0	1	0	1	0	0	1	1	0	0	0	4800	0	0
2	2	1001	2	0	65.72	1	0	99	99	99	99	0	0	0	0	0	0	0	0	0	0	1	0	1	2	2	0	0	1	1	0	0	0	0	1	0	0	0	1	0	0	1	0	1	0	0	2100	0	0
1	3	1001	2	0	70.4	1	1	1	1	1	1	1	1	99	99	0	0	99	1	1	0	1	1	0	2	2	0	0	1	1	0	0	0	0	0	0	1	0	1	0	0	1	0	0	0	1	6000	0	0
2	2	1001	2	0	74.07	1	0	1	1	0	0	1	0	0	0	0	0	0	0	1	0	0	0	0	2	2	0	1	1	1	0	0	0	0	0	0	1	0	1	0	1	1	1	0	0	0	4500	0	0
2	1	1001	2	0	64.37	1	0	1	1	0	1	0	0	0	0	0	1	0	1	1	0	0	0	1	2	2	0	0	1	2	0	0	0	0	1	0	0	0	1	0	0	0	0	0	0	0	0	0	0
1	3	1001	2	0	52.35	0	0	99	1	0	1	0	0	0	0	0	0	0	0	1	0	0	1	1	2	2	0	0	1	3	0	0	0	0	0	0	1	0	1	0	1	2	2	0	0	0	9800	0	0
1	3	1001	2	0	74.04	1	1	1	1	1	1	1	0	0	0	1	1	1	0	0	0	0	0	1	2	2	0	0	1	2	0	0	0	0	0	0	1	0	1	0	1	3	3	0	0	0	14400	0	0
1	2	1001	4	1	64.04	1	0	0	0	0	0	0	1	0	0	0	0	0	0	0	0	0	0	1	2	2	0	0	1	1	0	0	0	0	1	0	0	0	1	0	99	2	2	0	0	0	9000	0	0
1	3	1001	5	1	61.04	1	1	1	1	0	0	0	0	0	0	0	0	0	0	0	0	0	1	1	2	2	0	0	1	1	0	0	0	0	1	0	0	0	1	0	0	1	1	0	0	0	5000	0	0
1	3	1001	2	0	49.72	0	1	1	1	99	1	1	0	0	0	0	1	0	1	1	0	0	1	1	1	2	0	1	0	1	0	0	0	0	0	1	0	0	1	0	0	2	2	0	0	0	9000	0	0
1	1	1001	2	0	73.39	1	1	0	0	0	0	1	0	0	0	0	1	0	0	0	0	0	0	1	2	2	0	0	1	2	0	0	0	0	0	0	1	0	1	0	0	1	1	0	0	0	4800	0	0
1	3	1001	2	0	53.99	0	0	1	1	1	1	1	1	0	0	0	1	0	1	0	0	0	1	1	2	2	0	0	1	2	0	0	0	0	0	0	1	0	1	0	0	1	1	0	0	0	5500	0	0
2	3	1001	2	0	60.46	1	0	1	1	0	0	0	0	0	0	0	1	0	0	0	0	0	1	1	2	2	0	1	0	1	0	0	0	0	0	1	0	0	1	0	99	1	1	0	0	0	5500	0	0
1	3	1001	2	0	59.95	0	0	0	0	1	0	0	0	1	0	0	1	0	0	0	0	0	0	1	1	2	0	1	1	1	0	0	0	0	0	0	1	0	1	0	0	2	2	0	0	0	11300	0	0
2	3	1001	2	0	51.38	0	0	1	0	0	0	1	0	0	0	0	0	0	0	0	0	0	0	1	2	2	0	0	1	1	0	0	0	0	1	0	0	0	1	0	99	1	1	0	0	0	4500	0	0
1	3	1001	2	0	65.41	1	0	1	1	1	0	1	0	1	0	0	0	0	0	0	0	0	0	1	2	2	0	1	0	1	0	0	0	0	0	1	0	0	1	0	99	0	0	0	0	0	0	0	0
1	2	1001	2	0	71.55	1	1	99	1	0	0	0	0	0	0	0	0	0	0	1	0	0	1	0	2	2	0	0	1	1	0	0	0	0	0	1	0	0	1	0	1	1	1	0	0	0	5900	0	0
1	3	1001	2	0	58.72	0	0	1	1	1	1	0	0	0	0	0	1	0	0	0	0	1	1	0	2	2	0	0	1	1	0	0	0	0	1	0	0	0	1	0	0	2	0	0	2	0	20000	0	0
1	1	1001	2	0	51.88	0	1	1	1	1	0	0	0	0	0	0	1	0	1	1	0	0	1	1	2	2	0	0	1	1	0	0	0	0	0	0	1	0	1	0	1	1	0	0	0	1	6000	0	0
1	3	1001	2	0	50.97	0	1	1	1	1	1	0	1	0	0	0	1	0	0	1	0	0	1	0	2	2	0	1	1	1	0	0	0	0	0	1	0	0	1	0	1	2	2	0	0	0	9000	0	0
1	1	1001	2	0	50.35	0	1	0	0	0	0	0	0	0	0	0	1	0	99	0	0	0	0	0	2	2	0	0	1	2	0	0	0	0	0	0	1	0	1	0	0	1	1	0	0	0	5500	0	0
1	3	1001	2	0	52.97	0	1	0	1	0	1	0	0	0	0	0	1	0	0	1	0	0	1	1	2	2	0	0	1	2	0	0	0	0	0	1	0	0	1	0	99	2	0	1	0	1	8500	0	0
1	3	1001	2	0	68.34	1	0	1	1	1	0	1	0	0	0	0	1	0	0	0	0	0	0	1	2	2	0	0	1	1	0	0	0	0	1	0	0	0	1	0	1	1	1	0	0	0	5000	0	0
1	3	1001	2	0	65.06	1	1	1	1	1	0	1	0	1	0	0	1	0	0	1	0	0	1	1	2	2	0	1	0	3	0	0	0	0	0	1	0	0	1	0	99	1	1	0	0	0	4500	0	0
1	2	1001	2	0	44.13	0	1	1	1	0	1	0	99	0	0	0	1	0	0	1	0	0	1	1	2	2	0	0	1	2	0	0	0	0	1	0	0	0	1	0	1	1	1	0	0	0	4500	0	0
1	1	1001	4	1	55.05	0	1	99	99	99	99	99	99	99	99	99	1	99	99	0	0	99	99	0	2	2	0	0	1	1	0	0	0	0	1	0	0	0	1	0	1	2	2	0	0	0	11800	0	0
1	2	1001	1	0	47.12	0	1	1	0	0	0	0	1	0	0	0	1	0	0	0	0	1	1	1	2	2	0	0	1	1	0	0	0	0	1	0	0	0	1	0	99	1	1	0	0	0	4500	0	0
1	2	1001	1	0	42.03	0	0	0	1	0	1	1	0	0	0	0	1	0	1	0	0	1	1	0	2	2	0	0	1	1	0	0	0	0	0	0	1	0	1	0	99	2	2	0	0	0	11000	0	0
1	2	1001	1	0	65.53	1	1	0	1	0	1	0	0	0	0	0	1	0	0	1	0	0	0	0	2	2	0	1	0	4	0	0	0	0	1	1	0	0	2	1	99	3	3	0	0	0	17700	0	0
2	3	1001	2	0	71.84	1	1	0	0	0	0	0	0	0	0	0	1	0	0	0	0	0	0	0	2	2	0	1	0	1	0	0	0	0	1	0	0	0	1	0	0	1	1	0	0	0	4500	0	0
2	1	1001	2	0	55.11	0	0	1	1	1	0	1	0	0	0	0	1	0	0	1	0	1	1	0	2	2	0	0	1	2	0	0	0	0	1	0	0	0	1	0	1	2	0	0	0	2	11000	0	0
1	1	1001	2	0	62.84	1	0	1	1	1	0	1	0	0	0	0	1	0	0	1	0	1	1	0	2	2	0	0	1	2	0	0	0	0	1	0	0	0	1	0	0	1	1	0	0	0	5800	0	0
1	3	1001	2	0	68.53	1	1	1	1	0	1	1	0	0	0	0	0	0	1	1	0	0	0	0	2	2	0	1	0	3	0	0	0	0	1	1	0	0	2	1	99	5	4	0	0	1	30000	0	0
1	2	1001	2	0	54.96	0	1	1	0	1	0	0	0	0	0	0	1	0	0	0	0	0	1	1	2	2	0	0	1	2	0	0	0	0	1	0	0	0	1	0	1	0	0	0	0	0	0	1	1
1	3	1001	2	0	54.45	0	1	1	1	1	0	1	0	0	0	0	1	0	0	1	0	0	1	1	2	2	0	1	0	2	0	0	0	0	0	0	1	0	1	0	1	2	2	0	0	0	9800	0	0
2	1	1001	2	0	59.32	0	0	1	1	1	1	0	0	0	0	0	1	0	0	0	0	1	0	1	2	2	0	0	1	2	0	0	0	0	1	0	0	0	1	0	1	1	1	0	0	0	5000	0	0
1	2	1001	2	0	70.83	1	1	0	1	1	1	1	0	0	0	0	1	0	1	0	0	0	1	0	2	2	0	1	0	2	0	0	0	0	1	1	0	0	2	1	99	2	0	0	0	2	11000	0	0
1	3	1001	11	1	77.68	1	1	99	1	0	0	1	1	0	0	0	0	0	1	1	0	0	1	0	2	2	0	0	1	3	0	0	0	0	1	0	1	0	2	1	0	0	0	0	0	0	0	0	1
1	1	1001	10	1	75.44	1	0	1	1	1	1	0	1	0	0	0	0	0	1	1	0	0	1	0	2	2	0	0	1	1	0	0	0	0	1	0	0	0	1	0	0	0	0	0	0	0	0	0	0
2	2	1001	2	0	65.73	1	0	0	0	1	1	0	0	0	0	0	0	0	1	1	0	1	1	0	2	2	0	1	0	1	0	0	0	0	1	0	0	0	1	0	1	1	1	0	0	0	4500	0	0
2	1	1001	2	0	61.73	1	0	0	1	1	1	1	0	0	0	0	1	0	0	0	1	0	0	1	2	2	0	1	0	2	0	0	0	0	0	1	0	0	1	0	99	1	0	0	0	1	6000	0	0
2	1	1001	2	0	57.6	0	0	0	1	0	0	0	0	0	0	0	0	0	1	1	0	1	1	1	2	2	0	0	1	2	0	0	0	0	1	1	0	0	2	1	99	3	3	0	0	0	15900	0	0
2	3	1001	2	0	65.63	1	1	1	1	99	0	0	0	0	0	0	0	0	0	0	0	0	0	0	2	2	0	0	1	2	0	0	0	0	0	1	0	0	1	0	99	1	1	0	0	0	5900	0	0
2	3	1001	2	0	75.44	1	1	1	1	0	1	0	0	0	0	0	0	0	0	0	0	0	0	0	2	2	0	1	0	2	0	0	0	0	1	0	0	0	1	0	1	1	1	0	0	0	4500	0	0
2	1	1001	5	1	63.09	1	1	1	1	0	0	1	99	0	0	0	1	0	0	0	0	0	0	0	2	2	0	0	1	2	0	0	0	0	1	0	0	0	1	0	0	1	1	0	0	0	4800	0	0
1	2	1001	9	1	62.18	1	0	1	0	1	1	1	1	0	0	0	1	0	0	1	0	0	1	0	2	2	0	1	0	2	0	0	0	0	1	0	0	1	2	1	1	0	0	0	0	0	0	0	0
1	1	1001	2	0	74.65	1	1	1	1	0	0	1	99	0	0	0	1	0	0	1	0	0	1	0	2	2	0	0	1	2	0	0	0	0	0	0	1	0	1	0	0	1	1	0	0	0	5800	0	0
1	1	1001	2	0	43.17	0	1	1	1	99	99	1	99	0	0	0	1	0	0	0	0	0	1	0	2	1	0	0	1	1	0	0	0	0	1	1	1	0	3	1	1	1	1	0	0	0	4800	0	0
1	1	1001	2	0	64.96	1	1	1	1	1	0	1	1	0	0	0	1	0	0	0	0	1	1	0	2	1	0	0	1	2	0	0	0	0	1	0	0	0	1	0	0	1	0	0	0	1	6000	0	0
1	3	1001	2	0	77.71	1	1	99	1	99	0	1	99	0	0	0	0	0	0	0	0	0	0	0	2	2	0	0	1	2	0	0	0	0	1	0	1	0	2	1	1	0	0	0	0	0	0	0	1
1	1	1001	2	0	54.77	0	1	1	1	1	1	1	1	0	0	0	1	0	0	0	0	0	1	0	2	2	0	0	1	2	0	0	0	0	1	0	1	0	2	1	1	2	2	0	0	0	11800	0	0
2	2	1001	3	0	71.05	1	1	0	1	0	0	0	99	0	0	0	1	0	0	0	0	0	0	0	2	2	0	0	1	2	0	0	0	0	0	1	0	0	1	0	0	0	0	0	0	0	0	0	1
2	3	1001	4	1	65.13	1	0	1	1	1	0	1	1	0	0	0	0	1	1	0	0	1	1	0	2	2	0	1	1	2	0	0	0	0	1	1	0	0	2	1	1	3	2	0	0	1	9800	0	0
1	1	1001	2	0	46.83	0	0	1	1	0	1	1	1	0	0	0	0	0	1	0	0	0	1	0	2	1	0	0	1	2	0	0	0	0	1	1	1	0	3	1	0	2	1	0	0	1	10500	0	0
1	2	1001	3	0	73.6	1	1	1	1	1	0	1	1	0	0	0	1	0	1	0	0	0	1	0	2	2	0	0	1	2	0	0	0	0	1	0	1	0	2	1	0	1	1	0	0	0	4500	0	0
1	2	1001	2	0	44.42	0	1	1	1	0	0	1	0	0	0	1	1	0	0	0	0	0	1	0	2	1	0	1	0	2	0	0	0	0	1	0	1	0	2	1	1	2	2	0	0	0	11600	0	0
2	1	1001	7	1	68.1	1	0	1	1	1	0	0	0	0	0	1	1	0	0	0	0	1	1	1	2	1	0	1	0	2	0	0	0	0	1	0	0	0	1	0	1	1	1	0	0	0	5800	0	0
1	3	1001	2	0	61.24	1	1	0	0	1	0	0	1	0	0	0	0	0	0	0	0	0	1	0	2	2	0	0	1	2	0	0	0	0	1	1	0	0	2	1	1	0	0	0	0	0	0	0	0
2	3	1001	3	0	64.24	1	0	1	1	0	99	1	99	0	0	0	1	0	0	0	0	0	1	0	2	2	0	1	0	4	0	0	0	0	1	0	0	0	1	0	0	0	0	0	0	0	0	0	1
2	1	1001	2	0	68.95	1	0	0	1	1	0	99	1	0	0	0	0	0	0	0	0	0	0	0	2	2	0	1	0	2	0	0	0	0	1	0	0	0	1	0	0	1	1	0	0	0	6000	0	0
1	1	1001	5	1	51.13	0	1	99	0	0	0	99	99	0	0	0	1	0	0	1	0	1	1	0	2	1	0	0	1	2	0	0	0	0	1	1	0	0	2	1	0	1	1	0	0	0	5800	0	0
1	1	1001	2	0	58.43	0	1	1	1	1	0	1	0	0	0	0	1	0	1	1	0	0	0	0	2	1	0	0	1	2	0	0	0	0	0	0	1	0	1	0	0	1	1	0	0	0	4500	0	0
1	1	1001	2	0	59.79	0	1	0	1	99	99	99	99	0	0	0	1	0	0	0	0	1	0	0	2	2	0	0	1	2	0	0	0	0	1	1	1	0	3	1	1	3	0	1	0	2	13200	0	0
1	2	1001	3	0	57.23	0	1	1	1	0	1	1	1	0	0	0	1	0	1	0	0	0	0	1	2	2	0	0	1	1	0	0	0	0	1	1	0	0	2	1	1	1	1	0	0	0	4900	0	0
1	2	1001	2	0	52.31	0	1	1	0	99	0	1	0	0	0	0	1	0	0	0	0	1	1	0	2	2	0	0	1	1	0	0	0	0	1	0	0	0	1	0	0	1	1	0	0	0	4500	0	0
1	1	1001	3	0	74.4	1	1	1	1	99	0	0	99	0	0	0	1	0	0	0	0	1	0	0	2	2	0	0	1	2	0	0	0	0	1	0	0	0	1	0	1	0	0	0	0	0	0	1	1
1	1	1001	2	0	59.13	0	0	1	1	1	0	1	1	99	99	99	1	99	1	1	0	1	1	0	2	2	0	1	0	2	0	0	0	0	0	1	0	0	1	0	1	1	1	0	0	0	5800	0	0
1	1	1001	2	0	54.83	0	1	1	1	1	1	1	0	0	0	0	1	0	1	1	0	0	1	0	2	2	0	0	1	1	0	0	0	0	1	0	0	0	1	0	0	1	1	0	0	0	5900	0	0
1	1	1001	2	0	50.84	0	1	99	99	99	99	0	0	0	0	0	1	0	99	0	0	1	1	0	2	2	0	0	1	2	0	0	0	0	1	0	0	0	1	0	99	1	0	0	0	1	6000	0	0
2	3	1001	2	0	51.46	0	0	1	0	0	0	1	0	0	0	0	1	0	0	1	0	0	0	1	2	2	0	1	0	2	0	0	0	0	0	0	1	0	1	0	99	2	2	0	0	0	10000	0	0
1	1	1001	2	0	74.59	1	1	1	1	0	0	1	0	0	0	0	1	0	0	0	0	0	1	0	2	2	0	0	1	1	0	0	0	0	1	0	0	0	1	0	1	1	1	0	0	0	5800	0	0
2	2	1001	2	0	23.73	0	0	0	0	1	0	0	0	0	0	0	1	0	0	0	0	0	1	0	2	2	0	1	0	1	0	0	0	0	0	1	0	0	1	0	1	1	0	0	0	1	6000	0	0
2	2	1001	2	0	23.8	0	0	0	0	1	0	0	0	0	0	0	1	0	0	1	0	0	0	0	2	2	0	1	0	2	0	0	0	0	1	0	0	0	1	0	99	1	1	0	0	0	5900	0	0
1	2	1001	2	0	75.3	1	1	0	0	0	0	0	0	0	0	0	0	0	0	1	0	0	0	0	2	2	0	0	1	1	0	0	0	0	0	0	1	0	1	0	0	1	1	0	0	0	4500	0	0
1	1	1001	3	0	61.43	1	0	1	1	0	0	1	0	0	0	0	0	0	0	1	0	0	0	0	2	2	0	1	0	2	0	0	0	0	1	0	0	0	1	0	99	1	1	0	0	0	4500	0	0
2	1	1001	3	0	61.56	1	0	1	1	1	1	1	0	1	0	0	0	0	0	0	0	1	1	1	2	2	0	0	1	2	0	0	0	0	0	1	0	0	1	0	0	0	0	0	0	0	0	0	0
1	3	1001	2	0	65.82	1	1	0	1	1	1	1	0	0	0	0	0	0	1	1	0	0	1	1	2	2	0	0	1	1	0	0	0	0	1	0	0	0	1	0	1	1	1	0	0	0	5500	0	0
1	2	1001	2	0	67.23	1	1	0	1	1	0	1	1	0	0	0	1	0	0	0	0	1	1	0	2	1	0	1	0	1	0	0	0	0	1	0	1	1	3	1	1	2	2	0	0	0	9600	0	0
1	3	1001	2	0	62.97	1	1	99	0	0	99	0	99	99	99	99	1	99	99	0	0	0	99	0	2	2	0	0	1	1	0	0	0	0	1	0	0	0	1	0	1	1	1	0	0	0	5900	0	0
1	3	1001	2	0	53.75	0	1	1	0	1	1	1	0	0	0	0	1	0	0	0	0	1	1	0	2	2	0	1	0	1	0	0	0	0	0	0	1	0	1	0	0	2	2	0	0	0	9800	0	0
1	2	1001	2	0	60.49	1	1	1	1	1	1	1	0	0	0	0	1	0	0	0	0	0	0	0	2	1	0	0	1	2	0	0	0	0	1	0	1	0	2	1	0	1	1	0	0	0	5900	0	0
1	1	1001	2	0	52.62	0	0	1	0	0	0	1	0	0	0	0	1	0	1	1	0	0	0	1	2	2	0	0	1	2	0	0	0	0	0	0	1	0	1	0	1	1	1	0	0	0	5000	0	0
1	1	1001	11	1	72.85	1	1	1	1	1	0	0	1	0	0	1	1	0	0	0	0	1	1	0	2	2	0	1	0	2	0	0	0	0	1	0	0	0	1	0	0	1	0	0	0	1	6000	0	0
1	1	1001	2	0	52.18	0	1	1	1	0	0	0	0	0	0	0	1	0	0	0	0	1	1	1	2	2	0	0	1	3	0	0	0	0	0	0	1	0	1	0	0	1	0	0	1	0	10000	0	0
1	1	1001	3	0	58.94	0	0	1	1	1	0	1	0	0	0	0	0	0	1	1	0	0	1	0	2	2	0	1	0	1	0	0	0	0	1	1	1	0	3	1	0	1	1	0	0	0	5900	0	0
1	2	1001	1	0	56.01	0	1	0	1	99	1	1	0	0	0	0	0	0	0	1	0	0	0	0	2	2	0	1	0	1	0	0	0	0	1	1	0	0	2	1	1	2	2	0	0	0	10300	0	0
1	3	1001	2	0	44.96	0	1	1	1	0	0	1	0	0	0	0	1	0	0	1	0	0	0	0	2	2	0	1	0	1	0	0	0	0	0	0	1	0	1	0	1	2	1	0	0	1	10500	0	0
1	3	1001	2	0	59.11	0	0	0	1	1	0	0	0	0	0	0	0	0	0	1	0	0	0	0	2	2	0	1	0	2	0	0	0	0	1	1	0	0	2	1	99	2	1	0	0	1	10500	0	0
2	2	1001	3	0	70.94	1	0	1	1	1	1	1	0	0	0	0	0	0	0	0	0	1	1	1	2	2	0	0	1	1	0	0	0	0	0	1	0	0	1	0	1	1	1	0	0	0	4900	0	0
1	1	1001	2	0	48.48	0	1	1	1	1	1	1	0	0	0	0	1	0	1	0	0	1	1	1	2	2	0	0	1	1	0	0	0	0	1	0	0	0	1	0	1	0	0	0	0	0	0	1	1
1	1	1001	1	0	56.85	0	1	1	1	0	0	0	0	0	0	0	1	0	0	0	0	0	1	0	1	2	0	0	1	2	0	0	0	0	1	0	0	0	1	0	1	1	0	0	0	1	6000	0	0
2	3	1001	2	0	58.46	0	0	1	1	1	1	0	0	1	0	0	0	0	0	0	0	0	0	0	2	2	0	1	0	1	0	0	0	0	0	0	1	0	1	0	1	1	1	0	0	0	5900	0	0
1	3	1001	2	0	77.45	1	1	1	1	0	0	1	0	0	0	0	1	0	0	1	0	0	0	0	2	2	0	0	1	1	0	0	0	0	0	1	0	0	1	0	0	1	1	0	0	0	5000	0	0
1	2	1001	2	0	58.11	0	1	1	1	1	1	1	0	0	0	0	0	0	0	1	0	0	0	0	2	2	0	1	0	1	0	0	0	0	1	0	0	0	1	0	0	1	1	0	0	0	4500	0	0
1	2	1001	2	0	65.92	1	1	0	0	0	1	1	0	0	0	0	1	0	0	1	0	0	0	0	2	2	0	1	0	1	0	0	0	0	1	0	0	0	1	0	1	0	0	0	0	0	0	0	1
1	3	1001	2	0	53.61	0	1	1	1	1	0	0	0	0	0	0	1	0	0	0	0	0	0	0	2	2	0	0	1	1	0	0	0	0	0	1	0	0	1	0	1	1	1	0	0	0	4500	0	0
1	4	1001	2	0	50.19	0	0	1	1	1	1	1	0	0	0	0	1	0	1	0	0	0	1	0	2	2	0	0	1	3	0	0	0	0	1	0	0	0	1	0	0	1	1	0	0	0	4500	0	0
1	2	1001	4	1	53.79	0	1	0	0	0	0	0	0	0	0	0	1	0	0	0	0	0	1	0	2	2	0	0	1	2	0	0	0	0	1	0	0	0	1	0	0	1	1	0	0	0	4900	0	0
1	3	1001	2	0	66.24	1	0	1	0	0	0	1	1	0	0	0	1	0	1	0	0	0	0	1	2	1	0	1	0	1	0	0	0	0	1	0	0	0	1	0	0	1	1	0	0	0	5800	0	0
2	3	1001	2	0	62.19	1	0	1	1	0	0	0	0	0	0	0	0	0	0	0	0	1	1	1	2	2	0	1	0	2	0	0	0	0	0	1	0	0	1	0	1	1	1	0	0	0	5800	0	0
1	1	1001	2	0	55.46	0	1	1	1	1	0	1	1	0	0	0	1	0	1	1	0	0	0	0	2	2	0	0	1	1	0	0	0	0	1	0	0	0	1	0	1	2	1	0	0	1	11900	0	0
1	2	1001	3	0	72.18	1	0	99	1	0	1	1	99	0	0	0	1	0	0	0	0	0	1	0	2	2	0	1	0	2	0	0	0	0	1	1	1	0	3	1	1	1	1	0	0	0	4900	0	0
1	2	1001	2	0	59.01	0	0	0	1	1	0	0	0	0	0	0	1	0	1	0	0	1	1	0	2	2	0	0	1	2	0	0	0	0	0	0	1	0	1	0	1	1	1	0	0	0	4500	0	0
1	1	1001	1	0	54.91	0	1	0	99	1	1	0	0	0	0	0	1	0	0	1	0	0	1	0	2	2	0	1	0	1	0	0	0	0	0	0	0	1	1	0	1	2	0	0	0	2	11000	0	0
1	1	1001	2	0	58.98	0	1	0	1	1	0	99	0	0	0	1	1	0	0	1	0	1	1	0	2	2	0	0	1	2	0	0	0	0	0	0	1	0	1	0	1	0	0	0	0	0	0	0	0
1	1	1001	5	1	52.73	0	1	0	1	1	0	0	0	0	0	0	0	0	0	0	0	0	0	0	2	2	0	0	1	1	0	0	0	0	1	0	0	0	1	0	1	1	1	0	0	0	5900	0	0
1	3	1001	3	0	72.54	1	0	1	1	1	0	0	0	0	0	0	1	0	0	0	0	0	0	0	2	2	0	1	0	1	0	0	0	0	0	0	1	0	1	0	1	1	1	0	0	0	4500	0	0
1	1	1001	1	0	80.97	1	0	1	1	0	0	1	1	0	0	0	0	0	0	1	0	1	1	0	2	2	0	0	1	2	0	0	0	0	1	0	0	0	1	0	1	2	2	0	0	0	13000	0	0
1	2	1001	2	0	56.12	0	0	1	1	99	1	1	1	0	0	0	1	0	1	1	0	0	1	0	2	1	0	1	0	2	0	0	0	0	0	0	1	0	1	0	0	2	2	0	0	0	9800	0	0
2	1	1001	2	0	62	1	0	1	1	0	1	1	0	0	0	0	1	0	1	1	0	0	0	0	2	2	0	0	1	2	0	0	0	0	0	0	1	0	1	0	0	1	1	0	0	0	6000	0	0
2	1	1001	2	0	76.31	1	1	0	1	1	0	1	0	0	0	0	1	0	0	0	0	0	0	0	2	2	0	0	1	2	0	0	0	0	1	0	1	0	2	1	1	0	0	0	0	0	0	0	1
2	1	1001	2	0	68.64	1	0	1	0	0	1	0	0	0	0	0	0	0	1	0	0	0	1	0	2	2	0	0	1	2	0	0	0	0	0	0	1	0	1	0	0	2	0	2	0	0	4600	0	0
1	2	1001	2	0	66.26	1	1	0	1	99	1	99	0	0	0	0	1	0	0	0	1	1	0	0	2	2	0	0	1	2	0	0	0	0	0	0	1	0	1	0	1	0	0	0	0	0	0	1	1
1	1	1001	4	1	54.67	0	0	0	0	0	0	0	0	0	0	0	1	0	0	0	0	0	1	0	2	2	0	0	1	2	0	0	0	0	1	0	0	0	1	0	0	1	1	0	0	0	4800	0	0
1	2	1001	2	0	61.05	1	0	1	1	1	0	0	0	0	0	0	1	0	0	0	0	0	1	0	2	2	0	0	1	4	0	0	0	0	1	0	0	0	1	0	0	1	1	0	0	0	4900	0	0
1	1	1001	1	0	47.45	0	1	0	1	0	0	1	0	0	0	0	1	0	0	0	0	0	1	0	2	2	0	0	1	2	0	0	0	0	0	0	1	0	1	0	1	1	1	0	0	0	5800	0	0
1	1	1001	9	1	54.91	0	1	1	1	1	0	0	0	0	0	0	1	0	0	0	0	0	0	0	2	2	0	0	1	3	0	0	0	0	1	0	0	0	1	0	1	0	0	0	0	0	0	1	1
1	3	1001	4	1	64.59	1	1	0	1	1	0	1	0	0	0	0	0	0	0	1	0	0	1	0	2	2	0	1	0	2	0	0	0	0	0	0	1	0	1	0	1	0	0	0	0	0	0	0	1
1	3	1001	2	0	55.67	0	1	1	1	0	0	0	0	0	0	0	1	0	0	0	0	0	1	1	2	2	0	0	1	2	0	0	0	0	0	1	0	0	1	0	1	2	2	0	0	0	11800	0	0
1	3	1001	2	0	44.41	0	1	1	1	0	1	1	0	0	0	0	1	0	0	1	0	0	0	0	2	2	0	0	1	4	0	0	0	0	0	0	1	0	1	0	1	3	0	3	0	0	6300	0	0
1	3	1001	3	0	61.77	1	1	0	0	1	0	0	0	0	0	0	0	0	1	1	0	0	1	1	2	2	0	1	0	2	0	0	0	0	1	0	0	0	1	0	1	1	1	0	0	0	4900	0	0
1	3	1001	2	0	68.42	1	1	0	1	0	1	0	0	0	0	0	1	0	0	1	0	0	0	0	2	2	0	0	1	1	0	0	0	0	0	0	1	0	1	0	1	3	0	0	0	3	17000	0	0
1	1	1001	4	1	53.02	0	1	1	0	0	1	0	0	0	0	0	1	0	0	0	0	1	1	0	2	2	0	0	1	1	0	0	0	0	0	1	0	0	1	0	1	2	1	1	0	0	11600	0	0
1	2	1001	2	0	48.54	0	1	0	1	1	1	0	1	0	0	1	1	0	0	0	0	0	0	0	2	2	0	1	0	4	0	0	0	0	0	1	0	0	1	0	99	2	2	0	0	0	9000	0	0
1	2	1001	2	0	68.16	1	0	1	1	0	0	0	0	0	0	0	0	0	1	0	0	0	0	0	2	2	0	0	1	1	0	0	0	0	1	0	0	0	1	0	1	2	2	0	0	0	9300	0	0
1	3	1001	3	0	65.52	1	1	1	1	0	1	99	0	0	0	0	1	0	0	0	0	0	1	0	2	2	0	1	0	2	0	0	0	0	1	0	0	0	1	0	0	1	1	0	0	0	4900	0	0
1	1	1001	3	0	52.38	0	1	0	0	0	0	0	0	0	0	0	1	0	0	0	0	0	0	1	2	2	0	0	1	1	0	0	0	0	1	0	0	0	1	0	0	1	1	0	0	0	5000	0	0
1	4	1001	2	0	60.51	1	1	1	1	0	0	0	0	0	0	0	1	0	0	0	0	0	0	0	2	2	0	0	1	2	0	0	0	0	0	1	1	0	2	1	1	2	1	1	0	0	7900	0	0
1	1	1001	2	0	58.19	0	1	1	1	99	1	0	0	0	0	0	0	0	0	1	0	0	1	0	2	2	0	0	1	2	0	0	0	0	0	1	0	0	1	0	1	1	1	0	0	0	5500	0	0
1	1	1001	2	0	64.8	1	1	1	1	1	0	1	0	0	0	0	1	0	0	1	0	0	1	0	2	2	0	0	1	2	0	0	0	0	1	0	0	0	1	0	1	2	2	0	0	0	11800	0	0
1	3	1001	12	1	53.37	0	1	1	1	1	0	0	0	0	0	0	1	0	0	0	0	0	1	0	2	2	0	0	1	1	0	0	0	0	0	1	0	0	1	0	1	1	0	0	0	1	6000	0	0
2	3	1001	2	0	51.95	0	0	0	0	1	0	0	0	0	0	0	1	0	0	1	0	0	0	0	2	2	0	1	1	2	0	0	0	0	0	0	1	0	1	0	1	0	0	0	0	0	0	1	1
2	3	1001	2	0	74.57	1	0	0	0	1	1	0	0	0	0	0	1	0	0	1	0	1	1	0	2	2	0	0	1	2	0	0	0	0	0	0	1	0	1	0	1	3	3	0	0	0	16500	0	0
1	2	1001	2	0	32.73	0	1	1	1	1	0	0	0	0	0	0	1	0	0	1	0	0	0	0	2	2	0	0	1	1	0	0	0	0	1	0	1	0	2	1	1	1	0	0	0	1	6000	0	0
1	3	1001	2	0	60.09	1	1	0	0	1	0	0	0	0	0	0	0	0	0	1	0	0	1	0	2	2	0	0	1	3	0	0	0	0	0	0	1	0	1	0	1	2	2	0	0	0	9800	0	0
1	3	1001	2	0	58.92	0	1	0	0	1	1	1	0	0	0	0	0	0	0	1	0	0	1	0	2	2	0	0	1	2	0	0	0	0	1	0	0	0	1	0	1	2	2	0	0	0	11800	0	0
2	3	1001	4	1	68.27	1	0	0	1	1	1	1	0	0	0	0	1	0	0	0	0	0	1	0	2	2	0	1	1	2	0	0	0	0	0	1	0	0	1	0	1	2	2	0	0	0	10000	0	0
1	2	1001	2	0	67.9	1	1	0	1	0	1	0	0	0	0	0	0	0	0	0	0	0	0	0	2	2	0	1	0	2	0	0	0	0	1	0	0	0	1	0	1	1	1	0	0	0	4500	0	0
1	3	1001	2	0	68.64	1	0	1	1	1	1	1	0	0	0	0	0	0	1	1	1	0	1	0	2	2	0	1	0	2	0	0	0	0	1	0	0	0	1	0	1	2	2	0	0	0	9600	0	0
2	1	1001	5	1	57.46	0	0	0	0	0	0	0	0	0	0	0	1	0	0	1	0	1	1	0	2	2	0	1	0	1	0	0	0	0	0	0	1	0	1	0	1	1	1	0	0	0	5000	0	0
1	1	1001	14	1	59.93	0	1	0	0	1	0	0	0	0	0	0	1	0	0	1	0	0	1	0	2	2	0	1	0	1	0	0	0	0	0	0	1	0	1	0	1	3	2	1	0	0	11600	0	0
1	3	1001	5	1	62.01	1	1	0	0	0	0	0	0	0	0	0	0	0	0	0	0	0	0	0	2	2	0	0	1	2	0	0	0	0	1	0	0	0	1	0	1	2	2	0	0	0	11800	0	0
1	3	1001	4	1	65	1	1	0	0	0	0	0	0	0	0	0	1	0	0	0	0	0	1	0	2	2	0	1	0	1	0	0	0	0	0	0	1	0	1	0	1	0	0	0	0	0	0	0	0
1	1	1001	2	0	51.05	0	1	0	0	0	0	0	0	0	0	0	1	0	0	0	0	1	0	0	2	2	0	0	1	2	0	0	0	0	0	0	1	0	1	0	1	1	1	0	0	0	4900	0	0
1	3	1001	2	0	51.79	0	1	0	1	1	0	0	0	0	0	0	1	0	0	0	0	1	0	0	2	2	0	0	1	1	0	0	0	0	0	0	1	0	1	0	0	1	1	0	0	0	4500	0	0
1	1	1001	2	0	64.03	1	0	1	1	1	0	1	0	0	0	0	1	0	1	1	0	0	1	0	2	2	0	0	1	1	0	0	0	0	1	0	0	0	1	0	1	1	1	0	0	0	5900	0	0
1	1	1001	2	0	54.11	0	1	1	1	0	0	1	0	0	0	0	1	0	0	0	0	0	1	0	2	2	0	0	1	2	0	0	0	0	0	0	1	0	1	0	0	1	1	0	0	0	4500	0	0
1	3	1001	2	0	61.6	1	1	1	0	0	0	0	0	0	0	0	1	0	1	0	0	0	1	0	2	2	0	0	1	1	0	0	0	0	1	0	0	0	1	0	1	1	1	0	0	0	5900	0	0
1	1	1001	5	1	64.87	1	1	0	1	1	0	0	0	0	0	0	1	0	0	0	0	0	1	0	2	2	0	0	1	2	0	0	0	0	0	1	0	0	1	0	1	1	0	0	0	1	6000	0	0
1	1	1001	4	1	58.14	0	0	1	1	0	0	0	0	0	0	0	0	0	1	0	0	0	1	0	2	2	0	0	1	1	0	0	0	0	1	0	0	0	1	0	1	1	1	0	0	0	5800	0	0
1	1	1001	2	0	62.56	1	1	1	1	1	0	1	0	0	0	0	1	0	1	1	0	0	1	0	2	2	0	1	0	1	0	0	0	0	0	1	0	0	1	0	0	1	1	0	0	0	5800	0	0
1	1	1001	2	0	61.19	1	1	1	1	1	0	1	0	0	0	0	1	0	0	0	0	0	0	0	2	2	0	0	1	2	0	0	0	0	1	0	0	0	1	0	0	1	0	0	1	0	10000	0	0
1	1	1001	2	0	59.15	0	1	1	1	1	1	0	0	0	0	0	1	0	1	0	0	0	0	0	2	2	0	0	1	1	0	0	0	0	0	0	1	0	1	0	1	3	0	0	0	3	16000	0	0
1	3	1001	2	0	59.34	0	0	0	0	0	0	1	0	0	0	0	1	0	1	1	0	0	1	0	2	2	0	0	1	1	0	0	0	0	1	0	0	0	1	0	1	1	1	0	0	0	4500	0	0
1	2	1001	2	0	66.51	1	0	0	1	0	0	0	0	0	0	0	1	0	0	0	0	0	0	0	2	2	0	0	1	2	0	0	0	0	0	0	1	0	1	0	0	1	1	0	0	0	4800	0	0
1	1	1001	2	0	58.48	0	0	1	1	1	0	1	0	0	0	0	1	0	1	1	0	0	1	0	2	2	0	0	1	1	0	0	0	0	1	1	1	0	3	1	1	3	3	0	0	0	19500	0	0
1	3	1001	3	0	35.17	0	1	0	0	0	1	0	99	0	0	0	1	0	0	0	0	99	0	0	2	2	0	1	1	2	0	0	0	0	1	1	1	0	3	1	0	0	0	0	0	0	0	0	0
1	1	1001	2	0	60.68	1	1	1	1	1	1	1	0	0	0	0	0	0	0	1	0	0	0	0	2	2	0	0	1	2	0	0	0	0	1	0	0	0	1	0	0	0	0	0	0	0	0	0	0
1	3	1001	2	0	75.03	1	1	1	0	1	1	1	1	0	0	0	0	0	1	1	0	1	1	0	2	1	0	0	1	5	0	0	0	0	1	0	0	0	1	0	1	1	1	0	0	0	4800	0	0
2	2	1001	2	0	81.95	1	0	1	1	1	0	0	1	0	0	0	0	0	0	0	0	1	1	0	2	2	0	0	1	1	0	0	0	0	1	0	0	0	1	0	1	0	0	0	0	0	0	1	1
1	1	1001	3	0	48.4	0	1	1	0	1	1	1	1	0	0	0	1	0	0	1	0	1	1	0	2	1	0	0	1	2	0	0	0	0	1	1	1	0	3	1	1	1	1	0	0	0	4500	0	0
1	3	1001	6	1	38.44	0	1	1	1	1	1	99	0	0	0	0	0	0	1	1	0	1	1	0	2	1	0	0	1	2	0	0	0	0	1	0	1	0	2	1	1	2	0	2	0	0	4600	0	0
1	2	1001	9	1	67.96	1	0	0	0	1	1	0	1	0	0	0	1	0	0	0	0	1	0	0	2	2	0	0	1	2	0	0	0	0	1	1	1	0	3	1	1	3	2	0	0	1	15800	0	0
1	3	1001	2	0	69.65	1	0	1	1	1	0	1	1	99	0	0	0	99	1	1	0	0	1	0	2	1	0	1	0	2	0	0	0	0	0	1	1	0	2	1	1	0	0	0	0	0	0	1	1
1	1	1001	2	0	61.14	1	1	1	1	0	0	0	0	0	0	0	1	0	0	0	0	1	1	0	2	1	0	0	1	2	0	0	0	0	1	1	0	0	2	1	0	2	2	0	0	0	11700	0	0
1	3	1001	2	0	67.94	1	1	1	1	1	1	1	0	0	0	0	0	0	1	0	0	0	1	0	2	1	0	0	1	2	0	0	0	0	1	0	1	0	2	1	1	2	2	0	0	0	11800	0	0
1	3	1001	2	0	58.81	0	1	1	1	0	1	1	99	0	0	0	1	99	0	1	0	0	1	0	2	2	0	1	1	2	0	0	0	0	1	1	0	0	2	1	0	2	2	0	0	0	9600	0	0
1	2	1001	2	0	50.28	0	0	1	1	1	0	0	0	0	0	0	1	0	0	0	0	0	0	0	2	2	0	0	1	2	0	0	0	0	1	0	0	0	1	0	1	1	1	0	0	0	5000	0	0
1	3	1001	2	0	50.41	0	1	0	0	1	0	99	0	0	0	0	1	0	1	0	0	0	0	0	2	2	0	0	1	2	0	0	0	0	1	0	0	0	1	0	1	1	1	0	0	0	4500	0	0
1	3	1001	3	0	62.85	1	0	0	0	0	0	0	0	0	0	0	1	0	0	0	0	0	1	0	2	2	0	1	0	4	0	0	0	0	1	0	0	0	1	0	1	2	2	0	0	0	9000	0	0
2	1	1001	2	0	67.59	1	0	0	1	1	1	0	1	0	0	0	1	0	0	0	0	1	1	0	2	2	0	0	1	1	0	0	0	0	0	0	1	0	1	0	1	2	2	0	0	0	11800	0	0
2	3	1001	2	0	59.39	0	1	1	1	1	0	0	1	0	0	0	1	0	0	0	0	0	1	0	2	2	0	0	1	2	0	0	0	0	0	0	1	0	1	0	1	1	1	0	0	0	5000	0	0
1	1	1001	5	1	55.85	0	1	0	1	0	0	0	0	0	0	0	1	0	0	0	0	1	1	0	2	2	0	0	1	1	0	0	0	0	1	0	0	0	1	0	0	1	1	0	0	0	5900	0	0
2	1	1001	2	0	62.55	1	0	0	1	1	0	0	0	0	0	0	1	0	0	0	0	0	1	0	2	2	0	0	1	2	0	0	0	0	1	0	0	0	1	0	1	2	2	0	0	0	9000	0	0
1	2	1001	2	0	66.18	1	0	0	0	0	0	0	0	0	0	0	1	0	0	1	0	0	0	0	2	2	0	0	1	2	0	0	0	0	0	1	0	0	1	0	0	1	1	0	0	0	5800	0	0
1	2	1001	2	0	69.02	1	0	0	0	0	0	0	0	0	0	0	0	0	1	0	0	0	0	0	2	2	0	1	0	2	0	0	0	0	0	1	0	0	1	0	1	1	1	0	0	0	4500	0	0
1	3	1001	2	0	44.88	0	0	1	1	0	0	1	1	0	0	0	1	0	1	0	0	1	1	0	2	2	0	0	1	1	0	0	0	0	1	0	0	0	1	0	1	1	1	0	0	0	4500	0	0
1	3	1001	4	1	52.25	0	1	0	0	0	0	0	1	0	0	0	0	0	0	0	0	0	1	0	2	2	0	0	1	2	0	0	0	0	1	0	0	0	1	0	0	1	1	0	0	0	5900	0	0
2	1	1001	2	0	73.91	1	0	1	1	1	1	1	0	0	0	0	1	0	0	1	0	0	0	0	2	2	0	1	0	1	0	0	0	0	1	0	0	0	1	0	1	1	1	0	0	0	5800	0	0
1	3	1001	2	0	51.3	0	0	1	0	0	0	0	0	0	0	0	0	0	1	1	0	0	1	0	2	2	0	0	1	2	0	0	0	0	1	0	0	0	1	0	0	1	1	0	0	0	2300	0	0
1	2	1001	2	0	55.89	0	1	1	1	0	0	0	0	0	0	0	1	0	0	0	0	0	0	0	2	2	0	0	1	4	0	0	0	0	0	1	0	0	1	0	1	1	1	0	0	0	4800	0	0
1	3	1001	2	0	63.11	1	1	99	99	99	99	0	99	0	0	0	1	0	0	0	0	0	0	0	2	2	0	0	1	2	0	0	0	0	0	1	0	0	1	0	1	1	1	0	0	0	4900	0	0
1	3	1001	4	1	79.54	1	0	0	0	1	0	1	0	0	0	0	0	0	0	1	0	0	0	0	2	2	0	0	1	2	0	0	0	0	1	0	0	0	1	0	0	1	1	0	0	0	4900	0	0
1	2	1001	8	1	73.67	1	0	0	0	0	0	0	0	0	0	0	1	0	0	0	1	0	0	0	2	2	0	1	0	2	0	0	0	0	0	1	0	0	1	0	1	2	2	0	0	0	11800	0	0
2	3	1001	2	0	61.45	1	0	0	1	1	1	0	0	0	0	0	1	0	99	0	0	0	0	0	2	2	0	0	1	2	0	0	0	0	0	1	0	0	1	0	0	1	1	0	0	0	4500	0	0
2	1	1001	2	0	74.21	1	0	0	1	0	0	0	0	0	0	0	0	0	1	1	0	0	0	0	2	2	0	1	0	2	0	0	0	0	1	0	0	0	1	0	1	1	1	0	0	0	4500	0	0
1	3	1001	2	0	49.65	0	1	1	1	0	1	0	0	0	0	0	1	0	1	0	0	0	1	0	2	2	0	0	1	2	0	0	0	0	1	0	0	0	1	0	0	1	1	0	0	0	5500	0	0
1	3	1001	5	1	62.76	1	1	0	1	0	0	1	0	0	0	0	0	0	0	1	1	0	0	0	2	2	0	1	0	2	0	0	0	0	0	0	1	0	1	0	1	1	1	0	0	0	4500	0	0
2	1	1001	1	0	61.73	1	0	0	0	0	0	0	0	0	0	0	1	0	0	0	0	99	0	0	2	2	0	1	0	1	0	0	0	0	0	0	1	0	1	0	1	1	1	0	0	0	5900	0	0
2	1	1001	2	0	56.32	0	0	1	1	1	0	0	0	0	0	0	0	0	0	0	0	0	1	0	2	2	0	0	1	1	0	0	0	0	0	0	1	0	1	0	0	1	1	0	0	0	4500	0	0
1	2	1001	4	1	52.74	0	1	99	1	99	1	0	0	0	0	0	1	0	0	0	0	0	1	1	2	2	0	0	1	1	0	0	0	0	0	1	0	0	1	0	0	1	1	0	0	0	4500	0	0
2	1	1001	2	0	63.75	1	0	1	1	0	1	1	1	0	0	1	1	0	1	1	0	0	1	0	2	2	0	1	0	1	0	0	0	0	1	0	0	0	1	0	0	0	0	0	0	0	0	0	0
1	1	1001	2	0	60.43	1	0	1	1	0	0	1	0	0	0	0	1	0	1	1	0	0	0	0	2	2	0	0	1	1	0	0	0	0	1	0	0	0	1	0	1	0	0	0	0	0	0	1	1
1	1	1001	1	0	73.48	1	1	1	1	0	0	0	0	0	0	0	1	0	0	0	0	0	0	0	2	2	0	0	1	1	0	0	0	0	1	0	0	0	1	0	1	1	1	0	0	0	4800	0	0
1	3	1001	1	0	77.33	1	0	0	1	0	1	1	99	0	0	0	1	0	0	0	0	0	1	0	2	2	0	0	1	1	0	0	0	0	1	1	1	0	3	1	1	0	0	0	0	0	0	0	0
2	1	1001	1	0	65.14	1	0	1	1	1	1	0	0	0	0	0	0	0	0	0	0	0	0	0	2	2	0	0	1	1	0	0	0	0	1	0	0	0	1	0	0	0	0	0	0	0	0	0	0
1	3	1001	1	0	57.19	0	1	1	1	1	1	0	1	0	0	0	0	0	0	0	0	0	1	0	2	2	0	0	1	3	0	0	0	0	1	0	0	0	1	0	1	2	2	0	0	0	8000	0	0
1	3	1001	2	0	71.02	1	0	0	0	0	0	1	0	0	0	0	0	0	0	0	0	1	0	0	2	2	0	1	1	2	0	0	0	0	1	0	0	0	1	0	1	1	0	1	0	0	2300	0	0
1	1	1001	2	0	68.77	1	1	99	1	99	1	99	99	0	0	0	0	0	0	0	0	1	0	0	2	2	0	0	1	1	0	0	0	0	0	1	0	0	1	0	0	1	1	0	0	0	5000	0	0
2	3	1001	4	1	54.95	0	0	1	99	1	0	99	0	0	0	0	1	0	0	0	0	0	1	1	2	2	0	0	1	1	0	0	0	0	1	1	1	0	3	1	1	1	1	0	0	0	4500	0	0
1	3	1001	10	1	68.77	1	0	1	1	1	1	1	1	0	0	0	1	0	1	1	0	0	1	0	2	2	0	1	0	4	0	0	0	0	1	1	1	0	3	1	1	3	3	0	0	0	13500	0	0
1	1	1001	16	1	63.08	1	1	1	1	0	0	1	1	0	0	0	1	0	1	0	1	0	0	1	2	2	0	1	0	1	0	0	0	0	1	0	0	0	1	0	0	1	0	1	0	0	2500	0	0
2	3	1001	2	0	55.18	0	0	1	1	1	0	1	1	0	0	0	1	0	1	1	0	1	1	0	2	2	0	0	1	2	0	0	0	0	0	0	1	0	1	0	1	1	0	0	0	1	6000	0	0
1	3	1001	1	0	64.48	1	1	1	1	1	0	1	1	0	0	0	1	0	0	0	0	0	1	0	2	2	0	0	1	1	0	0	0	0	0	1	0	0	1	0	1	1	0	1	0	0	2300	0	0
1	3	1001	2	0	64.8	1	0	1	1	0	0	1	0	0	0	0	0	0	1	1	0	0	0	0	2	2	0	0	1	4	0	0	0	0	1	0	1	1	3	1	1	3	1	1	0	1	11700	0	0
2	1	1001	2	0	54.1	0	0	1	1	99	99	99	99	0	0	0	1	0	99	0	0	1	1	0	2	2	0	0	1	2	0	0	0	0	0	1	0	0	1	0	1	1	1	0	0	0	5900	0	0
1	3	1001	1	0	56.73	0	1	1	1	1	1	1	0	0	0	0	1	0	0	0	0	1	1	0	2	2	0	0	1	2	0	0	0	0	1	1	0	0	2	1	0	0	0	0	0	0	0	0	0
2	1	1001	1	0	54.83	0	0	1	1	1	1	1	1	0	0	0	1	0	0	1	0	0	1	0	2	2	0	1	1	1	0	0	0	0	1	0	0	0	1	0	0	0	0	0	0	0	0	0	0
1	3	1001	5	1	76.44	1	0	1	1	0	0	1	1	1	0	0	0	0	1	1	0	0	0	0	2	2	0	1	0	1	0	0	0	0	0	0	1	0	1	0	1	2	2	0	0	0	10000	0	0
2	3	1001	2	0	56.74	0	0	1	1	1	1	1	1	0	0	0	0	0	1	1	0	1	1	0	2	2	0	1	0	2	0	0	0	0	1	0	0	0	1	0	1	0	0	0	0	0	0	0	0
1	2	1001	2	0	64.57	1	1	99	1	99	1	1	0	0	0	0	0	0	0	0	0	0	0	0	2	2	0	0	1	1	0	0	0	0	1	0	0	0	1	0	1	1	1	0	0	0	5000	0	0
1	1	1001	2	0	51.8	0	1	1	1	1	0	1	0	0	0	0	1	0	1	1	0	0	1	0	2	2	0	0	1	3	0	0	0	0	1	1	0	0	2	1	1	4	3	0	1	0	17600	0	0
2	2	1001	0	0	59.62	0	0	1	0	99	99	1	99	0	0	1	1	0	99	0	0	0	1	0	2	2	0	1	0	2	0	0	0	0	1	0	1	0	2	1	1	1	1	0	0	0	4500	0	0
2	2	1001	8	1	59.67	0	0	1	0	99	1	1	1	0	0	1	0	0	1	1	0	0	1	0	2	2	0	1	0	1	0	0	0	0	0	0	1	1	2	1	1	1	1	0	0	0	5000	0	0
1	3	1001	6	1	68.58	1	0	1	1	1	1	1	0	0	0	0	1	0	1	1	1	0	0	0	2	2	0	1	0	1	0	0	0	0	1	1	1	0	3	1	1	0	0	0	0	0	0	0	0
2	2	1001	2	0	73.45	1	0	99	99	99	99	99	99	0	0	0	1	0	99	0	0	99	99	0	2	2	0	1	1	1	0	0	0	0	1	0	0	0	1	0	0	1	1	0	0	0	4900	0	0
2	3	1001	2	0	51.27	0	0	1	99	1	1	0	1	0	0	0	1	0	99	0	0	1	1	0	2	2	0	1	1	2	0	0	0	0	1	0	1	0	2	1	1	2	2	0	0	0	9000	0	0
2	3	1001	1	0	56.44	0	0	1	1	1	0	1	0	0	0	0	1	0	1	0	0	0	0	0	2	2	0	0	1	2	0	0	0	0	1	0	1	0	2	1	0	0	0	0	0	0	0	0	0
1	1	1001	1	0	70.32	1	1	1	1	1	0	1	0	0	0	0	1	0	0	1	0	0	1	0	2	2	0	0	1	1	0	0	0	0	1	0	0	0	1	0	0	0	0	0	0	0	0	0	0
2	1	1001	1	0	59.27	0	0	1	1	1	1	0	0	0	0	0	1	0	0	0	0	1	1	0	2	2	0	0	1	1	0	0	0	0	1	0	0	0	1	0	0	0	0	0	0	0	0	0	0
2	2	1001	2	0	60.27	1	0	1	0	0	0	1	0	0	0	0	1	0	0	0	0	0	1	0	2	2	0	0	1	1	0	0	0	0	1	0	0	0	1	0	0	0	0	0	0	0	0	0	0
[truncated: 11 more columns]
